1 **DIETARY MONOTERPENOIDS AS A NEW CLASS OF ALLOSTERIC HUMAN**  
2 **ARYL HYDROCARBON RECEPTOR ANTAGONISTS**

3  
4 Karolína Poulíková, Iveta Zůvalová, Barbora Vyhlídalová, Kristýna Krasulová, Eva Jiskrová,  
5 Radim Vrzal, Sandhya Kortagere, Martina Kopečná, David Kopečný, Marek Šebela,  
6 Katharina Maria Rolfes, Thomas Haarmann-Stemmann, Sridhar Mani\*, Zdeněk Dvořák\*

7  
8 *Department of Cell Biology and Genetics, Faculty of Science, Palacký University, Šlechtitelů*  
9 *27, 783 71 Olomouc, Czech Republic (K.P., I.Z., B.V., K.K., E.J., R.V., Z.D.)*

10 *Department of Protein Biochemistry and Proteomics, Centre of the Region Hana, Faculty of*  
11 *Science, Palacký University, Šlechtitelů 27, 783 71 Olomouc, Czech Republic (M.K., D.K.,*  
12 *M.Š.)*

13 *Department of Genetics and Department of Medicine, Albert Einstein College of Medicine,*  
14 *Bronx, NY 10461, U.S.A. (S.M.)*

15 *Department of Microbiology & Immunology, Drexel University College of Medicine,*  
16 *Philadelphia, PA 19129, U.S.A. (S.K.)*

17 *IUF-Leibniz-Research Institute for Environmental Medicine, 40225, Düsseldorf, Germany*  
18 *(K.M.R., T.H.S.)*

19

20 **Corresponding authors:** Zdeněk Dvořák

21 Department of Cell Biology and Genetics

22 Faculty of Science, Palacký University Olomouc

23 Slechtitelu 27; 783 71 Olomouc; Czech Republic

24 E: [moulin@email.cz](mailto:moulin@email.cz) T: +420-58-5634903 F: +420-58-5634901

25

26 Sridhar Mani

27 Department of Genetics and Department of Medicine

28 Albert Einstein College of Medicine

29 Bronx, NY 10461, U.S.A.

30 E: [sridhar.mani@einstein.yu.edu](mailto:sridhar.mani@einstein.yu.edu)

31

32

33

34

35 **ABSTRACT**

36 Carvones, the constituents of essential oils of dill, caraway, and spearmint, were reported to  
37 antagonize the human aryl hydrocarbon receptor (AhR); however, the exact molecular  
38 mechanism remains elusive. We show that carvones are non-competitive allosteric antagonists  
39 of the AhR that inhibit the induction of AhR target genes in a ligand-selective and cell type-  
40 specific manner. Carvones do not displace radiolabeled ligand from binding at the AhR, but  
41 they bind allosterically within the bHLH/PAS-A region of the AhR. Carvones did not  
42 influence a translocation of ligand-activated AhR into the nucleus. Carvones inhibited the  
43 heterodimerization of the AhR with its canonical partner ARNT and subsequent binding of  
44 the AhR to the promoter of CYP1A1. Interaction of carvones with potential off-targets,  
45 including ARNT and protein kinases, was refuted. This is the first report of a small dietary  
46 monoterpenoids as a new class of AhR non-competitive allosteric antagonists with the  
47 potential preventive and therapeutic application.

48

49

50

51

52

53

54

55

56 **Abbreviations:**

57 AhR, Aryl Hydrocarbon Receptor; ARNT, AhR Nuclear Translocator; BaP, Benzo[a]pyrene;  
58 DEX, Dexamethasone; EROD, 7-ethoxyresorufin-*O*-deethylase; FICZ, 6-formylindolo[3,2-  
59 b]carbazole; OR1A1, Odorant Receptor 1A1; PKC, Protein Kinase C; TCDD, 2,3,7,8-  
60 tetrachlorodibenzo-*p*-dioxin; TCDF, 2,3,7,8-tetrachlorodibenzofuran; VEGF, Vascular  
61 Endothelial Growth Factor

62

63

64

65

66

67

68

## 69 INTRODUCTION

70 The aryl hydrocarbon receptor (AhR) is a ligand-activated transcription factor that belongs to  
71 the family of basic helix-loop-helix transcription factors. In the resting state, unliganded AhR  
72 resides in the cytosol. Upon the ligand binding to the AhR, the complex ligand-receptor  
73 translocates to the cell nucleus. It forms a heterodimer with AhR nuclear translocator  
74 (ARNT), which binds to the specific response elements in the target genes' promoters. Typical  
75 xenobiotic ligands of the AhR are environmental contaminants such as polyaromatic  
76 hydrocarbons (e.g., benzo[a]pyrene - BaP) and halogenated aromatic hydrocarbons (e.g.,  
77 2,3,7,8-tetrachlorodibenzo-*p*-dioxin - TCDD), but also naturally occurring chemicals such as  
78 various polyphenols. Endogenous ligands of AhR are mainly intermediary and microbial  
79 metabolites of tryptophan, such as 6-formylindolo[3,2-*b*]carbazole (FICZ) [1]. The AhR  
80 regulates the expression of genes involved in xenoprotection, immune response, cell cycle,  
81 differentiation, lipid, and carbohydrate metabolism. Thereby, AhR is a pivotal determinant not  
82 only in human physiology (e.g., hematopoietic development)[2] but also in the incidence,  
83 onset, and progress of many pathophysiological processes, including carcinogenesis,  
84 inflammation, infection, diabetes, and cardiovascular diseases [3,4].

85 New selective AhR ligands' development has received attention in recent years because of  
86 their potential therapeutic and preventive potential [5,6]. For instance, rational drug design  
87 that included screening a chemical library of indoles and indazoles resulted in developing  
88 small molecules PY109 and PY108, which are highly potent AhR agonists ( $EC_{50} \sim 1.2$  nM).  
89 These drug-like indole mimics has demonstrated anti-inflammatory properties in mice, where  
90 they potently induced IL-22 and expanded tissue ILC3 and  $\gamma\delta$  T cell subpopulations [7]. Also,  
91 repositioning of clinically used AhR-active drugs such as tranilast, flutamide, or omeprazole  
92 was proposed as AhR-dependent chemotherapy to treat breast and pancreatic cancers [8]. The  
93 drawback with all these compounds for long term use are side effects and off-target effects of  
94 the drugs [9].

95 It is worthy of pointing out that most AhR ligands are partial agonists, which dose-  
96 dependently activate the AhR and at the same time behave as competitive antagonists when  
97 applied simultaneously with another, usually potent AhR agonist. Pure agonists of the AhR  
98 are, for example, highly potent and efficacious ligands such as TCDD, whereas pure  
99 antagonists are scarce. For instance, stilbenoid resveratrol or synthetic inhibitor of c-Jun-N-  
100 terminal kinase SP600125 had a long time been deemed as the AhR antagonists until their  
101 minimal residual agonist activity was unveiled [10]. The first identified and *bona fide*  
102 frequently used, the pure antagonist of the AhR was 3'-methoxy-4'-nitroflavone (MNF),

103 which bound with high affinity ( $K_i \sim 1.5$  nM) at rat hepatic cytosolic AhR, and competitively  
104 displaced  $^3\text{H}$ -TCDD [11]. However, several studies reported that AhR-dependent enhanced  
105 CYP1A1 transcription by MNF [12]. By a screening of a chemical library composed of  
106 10,000 compounds, 2-methyl-2*H*-pyrazole-3-carboxylic acid (2-methyl-4-*o*-tolylazo-phenyl)-  
107 amide (CH223191) was identified as a potent antagonist ( $\text{IC}_{50} \sim 30$  nM) of the AhR. It  
108 displaced TCDD from binding at the mouse AhR; thereby, the action mechanism was  
109 competitive [13]. Whereas a series of CH223191-based antagonists were developed, later on,  
110 the AhR-independent pro-proliferative properties of CH223191 were reported [14]. Also,  
111 CH223191 is a ligand-selective antagonist of the AhR. CH223191 preferentially inhibits  
112 halogenated aromatic hydrocarbons class of agonists (e.g., TCDD), but not others, like  
113 polyaromatic hydrocarbons or flavonoids [15]. The Perdew lab reported *N*-(2-(1*H*-indol-3-  
114 yl)ethyl)-9-isopropyl-2-(5-methyl pyridine-3-yl)-9*H*-purin-6-amine (GNF351) as high affinity  
115 ( $\text{IC}_{50} \sim 62$  nM) pure competitive antagonist of the AhR with a capability to inhibit both  
116 genomic and non-genomic actions of the AhR [16]. Given low intestinal absorption and  
117 extensive metabolism following an oral administration, GNF351 was proposed as a site-  
118 specific antagonist of the AhR in the intestine and colon [5]. There are isolated reports on the  
119 *in vitro* and *in vivo* effects of FDA-approved drugs with AhR-antagonist activity. For  
120 instance, clofazimine, an anti-leprosy drug and AhR antagonist, suppressed multiple myeloma  
121 in transgenic mice; however, the putative AhR-dependent mechanism was not directly  
122 evidenced [17]. Another example is the relapse during melanoma treatment with BRAF  
123 inhibitor vemurafenib, which was suggested to be delayed by targeting the constitutively  
124 active AhR in persisting cells with antagonists [18]. Moreover, we have identified  
125 vemurafenib as the competitive antagonist of the AhR, which inhibited *in vitro* and *in vivo*  
126 effects of AhR-dependent processes, including the abrogation of anti-inflammatory signaling  
127 and response [19].  
128 We recently reported that the essential oils of dill, caraway, and spearmint have antagonist  
129 effects on the AhR and that carvones, which are the major constituents of these oils, are  
130 responsible for the AhR antagonism [20]. Carvone is a monocyclic monoterpenoid in two  
131 optical conformers, "S" and "R". Humans distinguish the odor quality between sweetish,  
132 spearmint-like R-carvone and spicy, caraway-like S-carvone. Both carvones activate odorant  
133 receptor OR1A1 but displaying selectivity for individual enantiomers [21]. While we showed  
134 that carvones are antagonists of the AhR, the exact mechanism of how they influence the AhR  
135 signaling pathway remains elusive. Humans' exposure to carvones occurs mainly through the  
136 dietary intake of carvones-containing foods and beverages [20] and *via* percutaneous

137 absorption because carvones are used as skin permeabilizers in transdermal patches [22]. In  
138 the current study, we investigated in detail the antagonist effects of carvones on the human  
139 AhR, and we aimed to decipher their molecular mechanism of action. We describe the  
140 atypical, allosteric, and non-competitive mechanism of AhR antagonism, involving disruption  
141 of AhR-ARNT dimerization by carvones in the cell nucleus. This is the first report that small  
142 dietary monoterpenoids are a new class of AhR non-competitive allosteric antagonists with  
143 the potential preventive and therapeutic application.

144

## 145 **METHODS**

### 146 **Chemicals and materials**

147 S-carvone (sc-239480, purity 99.4 %, Lot L0613), R-carvone (sc-293985, purity 99.7 %, Lot  
148 H1015), and D-limonene (sc-205283, Lot F1314) were purchased from Santa Cruz  
149 Biotechnology. BaP (B1760, Lot SLBS0038V, purity 99 %), FICZ (SML1489, Lot  
150 0000026018, purity 99.5 %), staurosporine (S4400, purity 98%), deferoxamine mesylate  
151 (DFX; D9533, purity 92.5%) and dexamethasone (DEX; D4902, Lot 112K12845, purity 98  
152 %) were obtained from Sigma-Aldrich. TCDD (RPE-029) was purchased from Ultra  
153 Scientific, and 2,3,7,8-tetrachlorodibenzofuran (TCDF; Amb17620425, Lot 51207-31-9)  
154 was obtained from Ambinter. Radio-labelled [<sup>3</sup>H]-TCDD (ART 1642, Lot 181018, purity  
155 98.6 %) was purchased from American Radiolabeled Chemicals. Bio-Gel® HTP  
156 Hydroxyapatite (1300420, Lot 64079675) was obtained from Bio-Rad Laboratories.

157

### 158 **Cell lines and hepatocytes**

159 Human hepatoma cells HepG2 (ECACC No. 85011430), intestinal human colon  
160 adenocarcinoma cells LS180 (ECACC No. 87021202), human immortalized keratinocytes  
161 HaCaT (kindly donated by P. Boukamp, IUF Düsseldorf, Germany), and mouse hepatoma  
162 Hepa1c1 (ECACC No. 95090613) were cultured as recommended by the supplier. Primary  
163 human hepatocytes LH75 (female, 78 years, Caucasian) were prepared at the Faculty of  
164 Medicine, Palacky University Olomouc. The tissue acquisition protocol complied with the  
165 regulation issued by "Ethical Committee of the Faculty Hospital Olomouc, Czech Republic"  
166 and Transplantation law #285/2002 Coll. Primary human hepatocytes Hep200571 (male, 77  
167 years, unknown ethnicity) and Hep220993 (female, 76 years, Caucasian) were purchased  
168 from Biopredic International (Rennes, France). Mycoplasma Detection Kit-Digital Test v2.0  
169 Cat.No. B39132 (Biotool) was used to survey mycoplasma infection.

170

## 171 **Reporter gene assays**

172 The stably transfected gene reporter cell line AZ-AHR, derived from human hepatoma cells  
173 HepG2, expressing endogenous AhR and transfected with a construct containing several AhR  
174 binding sites upstream of a luciferase reporter gene, was used for the evaluation of the  
175 transcriptional activity of the AhR [23]. Cells were seeded at 96-well culture plates, and  
176 following 16 h of stabilization, they were incubated for 24 h with tested compounds or their  
177 combinations. After that, the cells were lysed, and luciferase activity was measured on a  
178 Tecan Infinite M200 Pro plate reader (Schoeller Instruments, Czech Republic). Half-maximal  
179 inhibitory concentrations (IC<sub>50</sub>), half-maximal effective concentrations (EC<sub>50</sub>), and  
180 concentrations of EC<sub>80</sub> were calculated using GraphPad Prism 8 software (GraphPad  
181 Software, San Diego, U.S.A.). Experiments were performed in at least two independent cell  
182 passages. Incubations and measurements were performed in quadruplicates (i.e., four  
183 technical replicates). (ref. Data in Figure 1).

184

## 185 **Quantitative real-time polymerase chain reaction qRT-PCR**

186 The total RNA was isolated using TRI Reagent® (Sigma-Aldrich). cDNA was synthesized  
187 from 1 µg of total RNA using M-MuLV Reverse Transcriptase and Random Primers 6  
188 (both New England Biolabs) at 42 °C for 60 min and diluted in 1:4 ratio by PCR grade  
189 water. qRT-PCR was carried out on Light Cycler® 480 Instrument II (Roche). Data were  
190 processed by the delta-delta C<sub>t</sub> method and normalized *per GAPDH* as a housekeeping  
191 gene. The levels of *GAPDH* and *CYP1A1* mRNAs were determined using probes and  
192 primers from Universal Probes Library (UPL; Roche). *GAPDH*-UPL60, fw:  
193 CTCTGCTCCTCCTGTTCGAC, rev: ACGACCAAATCCGTTGACTC and *CYP1A1*-  
194 UPL33, fw: CCAGGCTCCAAGAGTCCA, rev: GATCTTGGAGGTGGCTGCT.  
195 Eurofins Genomics primers were used for *VEGF* mRNA (vascular endothelial growth factor),  
196 fw: TGCAAAAACACAGACTCGCG, rev: TGTCACATCTGCAAGTACGTTTCG; and  
197 *GAPDH* mRNA, fw: AGGTGAAGGTCGGAGTCA, rev: GGTCATTGATGGCAACAA.

198

## 199 **Simple western blotting by Sally Sue™**

200 Total protein extract was isolated by using ice-cold lysis buffer (150 mM NaCl; 10 mM  
201 Tris pH 7.2; 1% (v/v) Triton X-100; 0.1% (w/v) SDS; 1% (v/v) sodium deoxycholate; 5  
202 mM EDTA; anti-protease cocktail; anti-phosphatase cocktail) and protein concentration  
203 was determined using Bradford reagent. Detection of *CYP1A1* and β-actin proteins was  
204 performed by Sally Sue™ Simple Western System (ProteinSimple™) using the Compass



205 Software version 2.6.5.0 (ProteinSimple™). Immuno-detection was performed using a  
206 primary antibody against CYP1A1 (mouse monoclonal, sc-393979, A-9, dilution 1:100,  
207 Santa Cruz Biotechnology) and  $\beta$ -actin (mouse monoclonal, 3700S, dilution 1:100, Cell  
208 Signalling Technology). Detection was performed by horseradish-conjugated secondary  
209 antibody followed by reaction with a chemiluminescent substrate.

210

### 211 **7-ethoxyresorufin-O-deethylase activity (EROD)**

212 AZ-AhR cells plated at 96-well culture dishes were incubated for 24 hours with vehicle  
213 (DMSO; 0.1% v/v), TCDD (13.5 nM) and/or S-carvone (1 mM)+TCDD (13.5 nM). After  
214 washing with PBS, the medium containing 7-ethoxyresorufin (8  $\mu$ M) and dicoumarol (10  $\mu$ M)  
215 was applied to the cells. Culture plates were incubated at 37 °C for 30 min. After that, an  
216 aliquot of 75  $\mu$ l of the medium was mixed with 125  $\mu$ l of methanol, and fluorescence was  
217 measured in a 96-well plate with 530 nm excitation and 590 nm emission filters, using Tecan  
218 Infinite M200 Pro plate reader (Schoeller Instruments, Czech Republic).

219

### 220 **Radioligand binding assay**

221 Cytosol from murine hepatoma Hepa1c1c7 cells was isolated as described [24]. Cytosolic  
222 protein (2 mg/mL) was incubated for 2 h at room temperature in the presence of 2 nM [<sup>3</sup>H]-  
223 TCDD with S-carvone (1  $\mu$ M, 10  $\mu$ M, 100  $\mu$ M, 1000  $\mu$ M), FICZ (10 nM; positive control),  
224 DEX (100 nM; negative control) or vehicle (DMSO; 0.1% V/V; corresponds to *specific*  
225 *binding of [<sup>3</sup>H]-TCDD = 100%*). Ligand binding to the cytosolic proteins was determined by  
226 the hydroxyapatite binding protocol and scintillation counting. Specific binding of [<sup>3</sup>H]-  
227 TCDD was determined as a difference between total and non-specific (TCDF; 200 nM)  
228 reactions. Five independent experiments were performed, and the incubations and  
229 measurements were done in triplicates in each experiment (technical replicates).

230

### 231 **Intracellular distribution of AhR**

232 Immunofluorescence assay was performed as recently described [25]. Briefly, LS180 cells  
233 were seeded on chamber slides (ibidi GmbH, Germany) and cultured for two days. Then, cells  
234 were treated for 90 min with carvones (1000  $\mu$ M) in combination with vehicle (0.1% DMSO)  
235 or the AhR agonists TCDD (20 nM), BaP (7  $\mu$ M), and FICZ (8 nM). After the treatment,  
236 washing, fixation, permeabilization, and blocking, cells were incubated with Alexa Fluor 488  
237 labeled primary antibody against the AhR (sc-133088, Santa Cruz Biotechnology, U.S.A.)  
238 diluted 1:500 in 0.5% bovine serum albumin at 4 °C overnight. The next day, nuclei were

239 stained by 4',6-diamino-2-phenylindole (DAPI), and cells were enclosed by VectaShield®  
240 Antifade Mounting Medium (Vector Laboratories Inc., U.S.A.). The AhR translocation into  
241 the nucleus was visualized and evaluated using fluorescence microscope IX73 (Olympus,  
242 Japan). The whole staining protocol was performed in two independent experiments in  
243 technical duplicates (with all tested compounds). The AhR translocation was evaluated  
244 visually depending on the distinct signal intensity of the AhR antibody in the nucleus and  
245 cytosol. For percentage calculation, approximately one hundred cells from at least four  
246 randomly selected fields of view in each replicate were used.

247

### 248 **Protein immunoprecipitation assay**

249 Effects of carvones on ligand-dependent hetero-dimerization of the AhR with ARNT were  
250 studied in cell lysates from LS180 cells incubated with carvones (1000  $\mu$ M) in combination  
251 with vehicle (0.1% DMSO) or the AhR agonists TCDD (20 nM), BaP (7  $\mu$ M) and FICZ (8  
252 nM) for 90 min at 37°C. Pierce™ Co-Immunoprecipitation Kit (Thermo Fisher Scientific)  
253 was used. In brief, 25  $\mu$ g of AhR antibody (mouse monoclonal, sc-133088, A-3, Santa Cruz  
254 Biotechnology) was covalently coupled on resin for 120 minutes at room temperature. The  
255 antibody-coupled resin was incubated with cell lysate overnight at 4 °C. In parallel with  
256 total parental lysates, eluted protein complexes were diluted in delivered sample buffer and  
257 resolved on 8% SDS-PAGE gels followed by Western blot analysis and immuno-detection  
258 with ARNT 1 antibody (mouse monoclonal, sc-17812, G-3, Santa Cruz Biotechnology).  
259 Chemiluminescent detection was performed using horseradish peroxidase-conjugated anti-  
260 mouse secondary antibody (7076S, Cell Signaling Technology) and WesternSure®  
261 PREMIUM Chemiluminescent Substrate (LI-COR Biotechnology) by C-DiGit® Blot  
262 Scanner (LI-COR Biotechnology).

263

### 264 **Chromatin immunoprecipitation assay**

265 The assay was performed as recently described [25]. Briefly, HepG2 cells were seeded in a  
266 60-mm dish, and the following day they were incubated with carvones (1000  $\mu$ M) in  
267 combination with vehicle (0.1% DMSO) or the AhR agonists TCDD (20 nM), BaP (7  $\mu$ M),  
268 and FICZ (8 nM) for 90 min at 37°C. The procedure followed the manufacturer's  
269 recommendations for SimpleChIP Plus Enzymatic Chromatin IP kit (Magnetic Beads) (Cell  
270 Signaling Technology; #9005). Anti-AhR rabbit monoclonal antibody was from Cell  
271 Signaling Technology (D5S6H; #83200). CYP1A1 promoter primers were: (fw:



272 AGCTAGGCCATGCCAAAT, rev: AAGGGTCTAGGTCTGCGTGT-3'). Experiments were  
273 performed in three consecutive cell passages.

274

### 275 **Protein kinase C inhibition assay**

276 Protein kinase C (PKC) inhibition was assayed in lysates from HepaG2 cells, using PKC  
277 Kinase Activity Assay Kit (ab139437; Abcam). Cells were grown to 90% confluency in a 60  
278 mm dish. After removing the medium, 1 mL of lysis buffer (E4030, Promega) was applied for  
279 10 minutes on ice. Cells were scraped, sonicated, and centrifuged at 13 000 rpm/15  
280 minutes/4°C (Eppendorf Centrifuge 5415R; Eppendorf, Stevenage, U.K.). Then, 3 µL of cell  
281 lysate were mixed with 297 µL of Kinase Assay Buffer and aliquoted 40 µL into 0.5 mL  
282 microtubes. These aliquots were mixed with 1/100 stock solutions of carvones, resulting in  
283 final concentrations of 10 µM, 100 µM, and 1000 µM. DMSO (1% V/V) and staurosporine (1  
284 µM) were negative and positive control, respectively. The reaction was initiated by the  
285 addition of 10 µL of reconstituted ATP, and the rest of the procedure was performed as  
286 described in the manufacturer's recommendation. Absorbance was measured at 450 nm using  
287 microplate reader Infinite M200 (TECAN, Austria). Results are expressed as % of the  
288 negative control. The cell lysate was stored at -80°C and used for performing three  
289 independent experiments.

290

### 291 **KINOMEscan™ profiling**

292 The KINOMEscan™ screening platform (scanMAX assay) employs a proprietary active site-  
293 directed competition binding assay that quantitatively measures interaction between test  
294 compounds (here 100 µM S-carvone) and 468 human protein kinases [26]. The assay was  
295 performed at Eurofins DiscoverX (San Diego, CA, U.S.A.).

296

### 297 **Molecular modeling and Docking**

298 The crystal structure complex of a construct of the human AhR with a truncated mouse ARNT  
299 has been solved (PDB code: 5NJ8) [27]. Since the solved structure does not contain the LBD  
300 of the AhR, it was modeled based on neuronal PAS-1 protein (pdb code: 5SY5) [28] as  
301 previously described [25]. The molecular structures of carvones were modeled using the  
302 ligand builder module of the Molecular Operating Environment – MOE program (ver 2018;  
303 Chemical Computing Group; Montreal, Canada). The molecules were energy minimized and  
304 geometry optimized for docking studies. Since carvones occupy a small volume and have the  
305 potential to bind nearly any binding pocket, we utilized a triage-based approach to finalize the

306 predicted binding pocket. We screened the PAS-B domain of the AhR containing the binding  
307 pockets for TCDD, FICZ, BaP, CH-223191, Vemurafenib, Dabrafenib, PLX7904, PLX8394,  
308 Resveratrol as detailed in [18] and our newly developed methylindoles [25]. Pockets included  
309 TCDD as a control for each of these dockings. All docking screening experiments were  
310 performed using GOLD version 5.2 (Cambridge Crystallographic Data Centre, Cambridge,  
311 UK) [29]. The complexes were ranked using the default option of GOLD SCORE, and the  
312 best ranking complexes were visualized in MOE. The molecules were also docked to the AhR  
313 derived from the AhR-ARNT complex. S-carvone bound AhR was then energy minimized  
314 and subject to molecular dynamics simulation with a production run of 10ns. All simulations  
315 were performed using Amber99 forcefield as adopted in the MOE program.

316

### 317 **Microscale thermophoresis**

318 A codon-optimized fragment of human AhR encoding amino acid residues 23–273 was  
319 synthesized and cloned into pET28b(+) using NdeI and BamHI restriction sites, expressing N-  
320 terminally fused 6×His-tag. A codon-optimized fragment of mouse ARNT encoding amino  
321 acid residues 85–345 was synthesized and cloned into pETDuet-1 using BamHI and HindIII  
322 restriction sites, expressing N-terminally fused 6×His-tag or using NcoI and HindIII  
323 restriction sites, expressing N-terminally FLAG-tag (GenScript, Leiden, Netherlands). A  
324 selection of truncated versions of the AhR and ARNT was done based on previously  
325 published data [27,30]. Both constructs were co-expressed in Rosetta 2 (DE3) *E. coli* cells  
326 (Novagen). Protein production was induced with 1 mM isopropyl-β-thiogalactopyranoside,  
327 and cells were grown at 20°C in LB medium overnight. Cells were lysed at 30 kpsi using the  
328 One-Shot cell lyser (Constant Systems Ltd.) and upon addition of EDTA-free cOmplete™  
329 protease inhibitor cocktail (Roche). B-PER complete bacterial protein extraction reagent  
330 (Thermo) and Denerase (c-LEcta) were added to the lysate. Protein heterodimers were  
331 partially purified using HisPur Cobalt columns (Thermo Fisher Scientific) into the final buffer  
332 containing 20 mM HEPES, pH 7.0, 300 mM NaCl, and 5% (w/v) glycerol. The presence of  
333 AhR and ARNT proteins was verified by Western blot using anti-His-tag (mouse monoclonal,  
334 MA1-21315, dilution 1:1000, Invitrogen) anti-FLAG-tag (rabbit monoclonal, 14793S,  
335 dilution 1:1000, Cell Signaling Technology) antibodies. In parallel, lysates from *E. coli* were  
336 separated by electrophoresis using precast NuPAGE Bis-Tris protein gels (Thermo Fisher  
337 Scientific) and visualized by a Coomassie Brilliant Blue staining. Excised gel pieces with  
338 protein bands corresponding to the expected molecular masses of recombinant AhR and  
339 ARNT were processed using previous in-gel digestion and peptide extraction protocols [31].

340 Peptides from the digests were subjected to nanoflow liquid chromatography separations  
341 coupled to electrospray ionization tandem mass spectrometry (nanoLC-ESI-MS/MS) for  
342 protein identification *via* peptide sequencing and database searches. The nanoLC-ESI-MS/MS  
343 instrumental system was a Dionex UltiMate3000 RSLCnano liquid chromatography (Thermo  
344 Fisher Scientific) and an amaZon speed ETD ion trap equipped with a CaptiveSpray ion  
345 source (Bruker Daltonik). The chromatographic columns used and the mobile phases  
346 composition, gradient programming, data collection, and bioinformatics were already  
347 described [32].

348 Protein fractions were concentrated to 2 mg.ml<sup>-1</sup> using 10 kDa filters (Amicon) and stored at  
349 5°C for 10 days. Microscale thermophoresis was used to determine S-carvone and D-  
350 limonene's binding to human 6×His-tagged hAhR in complex with FLAG-mARNT. The  
351 protein (200 nM) was fluorescently labeled using a RED-tris-NTA 2<sup>nd</sup> generation dye  
352 (NanoTemper Technologies GmbH) and a 1:1 dye/protein molar ratio in the reaction buffer:  
353 20 mM Tris-HCl, pH 7.4 supplemented with 150 mM NaCl and 0.075% Tween-20. Ligands  
354 were dissolved in ethanol (max. 0.5% final concentration in the reaction mixture).  
355 Measurements were performed on a Monolith NT.115 instrument (NanoTemper Technologies  
356 GmbH) at 25°C with 3 s / 22 s / 2 s laser off/on/off times and continuous sample fluorescence  
357 recording in premium capillaries and using an excitation power of 90% and a high MST  
358 power mode. The normalized fluorescence  $\Delta F_{\text{norm}}$  [%] as a function of the ligand  
359 concentration was analyzed to conclude a ligand binding interaction.

360

### 361 **Statistics**

362 All statistical analyses, as well as the calculations of half-maximal effective concentration  
363 (EC<sub>50</sub>), EC<sub>80</sub>, and half-maximal inhibitory concentration (IC<sub>50</sub>) values, were performed  
364 using GraphPad Prism 8 for Windows (GraphPad Software, La Jolla, CA, U.S.A.).  
365 The number of independent repeats and technical replicates are stated in the respective  
366 figure legends for all the experiments. Where appropriate, data were processed by one-way  
367 analysis of variance (ANOVA) followed by Dunnett's test. Results with p-values lower  
368 than 0.05 were considered significant—the EC<sub>50</sub>, EC<sub>80</sub>, and IC<sub>50</sub> values were calculated  
369 using the nonlinear regression by the least-square fitting method. The R-squared value was  
370 checked in all of the calculations and did not drop below 0.9. Inhibition constant (K<sub>i</sub>) was  
371 calculated using the Cheng-Prusoff equation [33].

372

373

374

## 375 **RESULTS**

### 376 **Carvones are non-competitive antagonists of the AhR.**

377 Human stably transfected reporter cell line AZ-AHR [23] was used to investigate the effects  
378 of carvones on transcriptional activity of the AhR. Model AhR full agonists, including TCDD,  
379 BaP, and FICZ, caused a concentration-dependent increase of AhR-mediated luciferase  
380 activity (Figure 1A). Carvones did not affect the basal transcriptional activity of AhR (Figure  
381 1A). Effects of carvones on agonist-inducible AhR activity were examined in cells co-  
382 incubated with a fixed concentration of agonist ligands (corresponding to their EC<sub>80</sub>) and  
383 increasing concentration carvones (antagonist mode). Both carvones exerted concentration-  
384 dependent antagonist effects on AhR activation by all tested agonists. In the case of FICZ, the  
385 value of IC<sub>50</sub> was not reached even in the highest concentrations of carvones. The inhibitor  
386 constants of S-carvone / R-carvone on BaP- and TCDD-inducible AhR activities were 14.0  
387 μM / 11.6 μM and 8.6 μM / 10.5 μM, respectively (Figure 1B). Next, we incubated cells with  
388 fixed concentrations of carvones (0 μM; 10 μM; 100 μM; 500 μM; 1000 μM) combined with  
389 increasing concentrations of AhR agonists. We observed a gradual decrease of E<sub>MAX</sub> (and a  
390 slight decline of EC<sub>50</sub>) with increasing fixed concentrations of carvones for each tested  
391 agonist (Figure 1C). These data imply that carvones are primarily either non-competitive,  
392 irreversible competitive, or uncompetitive antagonists of the AhR. Since the same  
393 concentration of carvones antagonized both high and low concentrations of all used agonists  
394 to a comparable degree (Suppl. Table 1), the uncompetitive mechanism can be ruled out [34].  
395

### 396 **Carvones down-regulate AhR target gene, *Cytochrome P450 1A1 (CYP1A1)***

397 Since carvones antagonized the AhR, we examined the effects of carvones on the ligand-  
398 inducible expression of prototypical AhR target gene CYP1A1, using a complementary set of  
399 AhR competent human cells, including hepatocarcinoma cells HepG2, colon adenocarcinoma  
400 cells LS180, and immortal keratinocytes HaCaT. Both carvones inhibited ligand-inducible  
401 expression of *CYP1A1* mRNA and protein in cell type-specific and ligand-selective manner.  
402 Induction of *CYP1A1* by TCDD was inhibited by carvones in all cell lines, by BaP in LS180  
403 and HaCaT cells, and by FICZ only in HaCaT cells (Figure 2). We also observed down-  
404 regulation of TCDD-, BaP- and FICZ-inducible *CYP1A1* and *CYP1A2* mRNAs by carvones  
405 in three primary cultures of human hepatocytes (Suppl. Figure 1). Also, TCDD-inducible, the  
406 AhR receptor-regulated, 7-ethoxyresorufin-*O*-deethylase (EROD) was strongly decreased by  
407 S-carvone in AZ-AHR human hepatoma cells (Suppl. Figure 2).

408

409 **Carvones influence cellular functions of the AhR.**

410 We analyzed in detail the effects of carvones on individual cellular events throughout the  
411 AhR signaling pathway. The AhR agonists TCDD, BaP, and FICZ triggered the AhR from  
412 the cytosol to the nucleus, and carvones did not influence this process. Also, carvones alone  
413 did not induce AhR nuclear translocation (Figure 3A; Suppl. Table 2). Nuclear, ligand-bound  
414 AhR forms a heterodimer with ARNT, which in turn binds specific dioxin-response elements  
415 in promoters of target genes, such as *CYP1A1*. This pathway, involving ARNT, is referred to  
416 as canonical AhR signaling. Carvones strongly inhibited the formation of AhR-ARNT  
417 heterodimer (Figure 3B) and the binding of the AhR in *CYP1A1* promoter (Figure 3C) in cells  
418 stimulated with TCDD- and BaP-, but not with FICZ. A scheme summarizing the effects of  
419 carvone on the AhR functions is depicted in Figure 3D.

420

421 **S-carvone does not inhibit a random panel of protein kinases, including PKC.**

422 There are numerous reports about the involvement of protein kinase C in the AhR functions.  
423 Blocking protein kinase C (PKC) activity was reported to inhibit transcription of *CYP1A1* but  
424 has no effect on nuclear translocation of the AhR [35], which was also the case here, observed  
425 with carvones. Therefore, we tested whether carvones inhibit PKC catalytic activity. We did  
426 not observe any decline in PKC activity measured in lysates from HepG2 cells incubated with  
427 carvones in concentrations up to 1000  $\mu$ M, which rules out PKC inhibition's involvement in  
428 the effects of carvones on the AhR (Figure 4A). We also evaluated the interaction between  
429 100  $\mu$ M S-carvone and 468 human protein kinases, employing KINOMEScan<sup>TM</sup> (scanMAX  
430 assay), a proprietary active site-directed competition binding assay [26]. The minimal  
431 inhibitory threshold by screening platform KINOMEScan<sup>TM</sup> is 35% of control kinase activity.  
432 Out of 468 kinases tested, 467 were above the 35% cut-off. TYK2(JH2 domain pseudo-  
433 kinase) activity was inhibited down-to 27% of control activity, but this kinase is not relevant  
434 to the regulation of the transcription activity (Figure 4B; Suppl. Figure 3). Overall, we  
435 excluded the possibility that the effects of carvones on the AhR signaling are indirect due to  
436 the inhibition of human kinome, particularly PKC.

437

438 **Carvones do not inhibit the transcriptional activity of ARNT.**

439 ARNT is involved in other cellular pathways besides that of AhR, such as hypoxia signaling  
440 that is transcriptionally mediated by ARNT heterodimer with hypoxia-inducible factor 1 $\alpha$

441 (HIF1 $\alpha$ ). Therefore, we investigated the effects of carvones on hypoxia-mimic inducible,  
442 ARNT-dependent expression of vascular endothelial growth factor (VEGF) mRNA in HaCaT  
443 cells incubated with deferoxamine. The levels of VEGF mRNA were induced 5-fold by  
444 deferoxamine, and carvones did not influence this induction in concentrations up to 1000  $\mu$ M  
445 (Figure 4C-right panel). Consistently, the hypoxia-mimic decrease of CYP1A1 mRNA was  
446 not affected by carvones (Figure 4C-left panel). These data imply that carvones do not inhibit  
447 ARNT transcriptional activity and that disruption of AhR-ARNT complex formation is not  
448 due to the interaction of carvones with ARNT.

449

### 450 **Binding of carvones to the AhR**

451 Reporter gene assay revealed that carvones are non-competitive antagonists of the AhR  
452 (Figure 1), implying they should not competitively displace ligands from binding at the AhR.  
453 This assumption was corroborated by competitive radio-ligand binding assay, where S-  
454 carvone did not inhibit the binding of <sup>3</sup>H-TCDD at mouse hepatic AhR. However, we  
455 observed a slight, concentration-independent decrease of <sup>3</sup>H-TCDD binding in the presence of  
456 1000  $\mu$ M S-carvone (Figure 5A). Non-competitive antagonism may occur through (i)  
457 Allosteric hindrance (direct or involving conformational change) of ligand binding pocket at  
458 AhR, thereby preventing proper binding of the ligand and switching-on the AhR. This  
459 scenario is unlikely because the ligand-dependent nuclear translocation of AhR was not  
460 disturbed by carvones (Figure 3A). For this reason, also irreversible competitive antagonism  
461 is not likely. (ii) An indirect mechanism, occurring either at AhR or off-target, such as protein  
462 kinases or ARNT (*vide supra*). Therefore, we further investigated the allosteric binding of  
463 carvones at the AhR and their effects on AhR-ARNT heterodimerization. Molecular Docking  
464 of carvones to various known binding pockets of the AhR ligands such as TCDD, resveratrol,  
465 FICZ, BaP, and methylindoles suggested that carvones may non-specifically bind to these  
466 sites with an average docking score of 47.5 and 42, respectively. However, this binding could  
467 be due to their relatively small size and could have no functional effect. Based on the  
468 experimental evidence that carvones inhibit the formation of AhR-ARNT (Figure 3B), we  
469 docked these molecules to the heterodimerization interface of AhR and ARNT. This interface  
470 spans several interdomain interactions that also form the dioxin responsive element binding  
471 pocket [36]. One such interface region is the  $\alpha$ 1- $\alpha$ 2 helical region of the bHLH domain  
472 consisting of residues Leu43, Leu47, Leu50 from  $\alpha$ 1 helix and Tyr76, Leu72, Leu77 from  $\alpha$ 2  
473 helical region. Carvones were docked to the interface site, and the complex of the AhR with



474 carvones was simulated for 10 ns to allow the ligand to stably dock to the AhR (Figure 5B;  
475 left). Carvones bind favorably at a site formed by residues from the bHLH domain, including  
476 close contact with Tyr76, Pro55, Phe83, Tyr137, Leu72, Ala138, Lys80, Ser75, Phe56, Ala79,  
477 Phe136, Gln150 and Ile154 (Figure 5B; middle). More significantly, binding of carvones to  
478 this site shifts the position of both the  $\alpha 1$  and  $\alpha 2$  helical region by 1-3 Å (Figure 5B; right)  
479 that can significantly affect the formation of the AhR-ARNT complex. Using microscale  
480 thermophoresis, using bacterially co-expressed fragments of the AhR and ARNT, we showed  
481 that carvones bind the AhR but not ARNT (Figure 5C). Whereas the binding of carvones to  
482 the AhR was concentration-dependent, the apparent binding constant  $K_D$  could not be  
483 determined since it lay in the low millimolar range, probably due to artificial conditions using  
484 truncated variants of the AhR and ARNT. The AhR fragment spanned from 23 to 273 amino  
485 acid residues, which implies that the binding of carvones was localized outside the  
486 conventional ligand-binding domain, but within the bHLH/PAS-A region of the AhR. These  
487 data fully support the hypothesis that carvones' non-competitive antagonism involves their  
488 allosteric binding at the AhR. Also, D-limonene (de-oxo analog of carvone) did not display  
489 the AhR antagonism and did not bind the AhR, which reveals the significance of *oxo* moiety  
490 in carvone molecule for its interaction with the AhR, tentatively through hydrogen bonds  
491 (Suppl. Figure 4).

492

## 493 **DISCUSSION**

494 Therapeutic targeting of the AhR has long been neglected, mainly due to the negative stigma  
495 of being a receptor mediating TCDD toxicity. With increasing knowledge on the  
496 physiological and pathophysiological roles of the AhR, the attempts for its targeting have  
497 emerged, including the therapy of cancer, inflammatory bowel disease, or atopic dermatitis.  
498 Following strategies are employed: (i) A repositioning of clinically used AhR-active drugs  
499 (e.g., tranilast, flutamide, omeprazole); (ii). Chemoprevention with dietary AhR-active  
500 compounds (e.g., indole-3-carbinol, diindolylmethane); (iii) Application of novel AhR ligands  
501 identified by screening chemical libraries (e.g., CH223191) or by rational design (e.g.,  
502 PY109).

503 The interactions between the small-molecule compound and the AhR may occur either  
504 directly (ligand-dependent) or indirectly (ligand-independent) through off-targets such as  
505 PKC [35], protein tyrosine kinases [37], or cAMP [38]. To date, all reported AhR ligands,  
506 both agonists and antagonists, are the orthosteric ones. i.e., those that bind to a conventional

507 discrete site on the AhR protein are referred to as ligand-binding pocket. Recently, three  
508 structurally distinct groups of chemicals were defined according to the mode of their  
509 interactions with residues within the AhR ligand binding site [39]. Depending on their effects  
510 on the AhR functions, these ligands comprise full agonists, partial agonists, and competitive  
511 antagonists. Herein, this is the first report on small molecule compounds acting as allosteric  
512 antagonists of human AhR, which may potentially be of clinical importance. Indeed, targeting  
513 secondary binding sites at a variety of receptors is an emerging approach in drug discovery  
514 [40-42]. The examples of already approved allosteric modulator drugs are Cinacalcet for the  
515 treatment of hyperparathyroidism (positive modulator of the calcium-sensing receptor) or  
516 Maraviroc for the treatments of AIDS (negative modulator of C-C chemokine receptor 5).  
517 Many other compounds are yet under patent protection, such as positive allosteric modulators  
518 of dopamine receptors in the treatment of Parkinson's disease and schizophrenia (Pat. Appl. #  
519 WO/2014/193781; Eli Lilly&Co) or negative allosteric modulators of metabotropic glutamate  
520 receptors for the treatment of CNS disorders (Pat. Appl. # WO/2014/195311; Janssen  
521 Pharmaceutica). Scheuermann et al described synthetic allosteric inhibitors of hypoxia-  
522 inducible factor HIF2 $\alpha$ , which bound in a large cavity within a hydrophobic core of PAS-B  
523 domain of HIF2 $\alpha$ , inducing structural and functional changes leading to the antagonization of  
524 HIF2 $\alpha$  heterodimerization with ARNT [43].

525 Applying a series of complementary mechanistic experiments, we demonstrate that carvones  
526 are non-competitive antagonists of human AhR, acting through allosteric binding in the region  
527 of the AhR involved in heterodimerization with ARNT, thereby preventing the formation of  
528 functional AhR-ARNT heterodimer. In brief, detailed analyses of the AhR transcriptional  
529 response in reporter gene assays revealed a non-competitive mechanism of carvones  
530 antagonism. This is consistent with the finding that carvones did not displace <sup>3</sup>H-TCDD from  
531 binding at AhR and also did not inhibit ligand-elicited nuclear translocation of the AhR. On  
532 the other hand, S/R-carvones inhibited the formation of AhR-ARNT heterodimer, and all  
533 downward events involving binding of the AhR to DNA, and the expression of AhR-target  
534 genes. In search of the exact mechanism of how carvones inhibit the formation of AhR-ARNT  
535 heterodimer, we excluded the interaction of carvones with potential off-targets, including  
536 ARNT, PKC, and other 468 kinases.

537 Differential roles of the AhR and ARNT residues on molecular events preceding (ligand  
538 binding, nuclear translocation) and following (DNA binding) heterodimerization of the AhR  
539 with ARNT were determined by Corrada et al. by combining site-directed mutagenesis,

540 structural modeling, and homology docking approach [44,45]. Crystal structure of mouse  
541 AhR PAS-A domain revealed that mouse AhR residues Ala119 and Leu120 are critically  
542 crucial for hydrophobic interactions at the AhR-ARNT interface and the process dimerization  
543 [46]. Seok et al. determined the crystal structure of mouse AhR-ARNT heterodimer in  
544 complex with DRE, showing that ARNT curls around AhR into a highly inter-winded  
545 asymmetric architecture, with extensive heterodimerization interfaces and AhR inter-domain  
546 interactions. They proposed the phenomenon of ligand-selective structural hierarchy for  
547 complex scenarios of the AhR activation [36]. Mutations in mAHR residues Leu42 and  
548 Leu120 (homologous to human Leu43 and Leu122) led to a decreased binding of AhR-ARNT  
549 to DRE [36], which corroborates the findings of Wu et al. [46]. Interestingly, mutation of  
550 Leu49 in mAHR kept intact nuclear translocation of the AhR but inhibited its transcription  
551 activity [36], which is mimicked by binding of carvones at the AhR. According to our  
552 docking data, carvones interact with residues from the bHLH domain, including close contact  
553 with Tyr76, Pro55, Phe83, Tyr137, Leu72, Ala138, Lys80, Ser75, Phe56, Ala79, Phe136,  
554 Gln150, and Ile154. Binding of carvones to this site shifts the position of  $\alpha 1$  and  $\alpha 2$  helical  
555 regions by 1-3 Å (Figure 5B; right) that can significantly affect the formation of the AhR-  
556 ARNT complex. This assumption was experimentally confirmed, and direct binding of  
557 carvones at the AhR fragment spanning from 23 to 273 amino acid residues was demonstrated  
558 using microscale thermophoresis. Also, the significance of *oxo* moiety in the molecule of  
559 carvone, for its interaction with the AhR, tentatively through hydrogen bonds, was  
560 demonstrated.

561 Two issues about the AhR-active concentration of carvones: Firstly, the biological effects of  
562 carvones against the AhR were attained in concentrations spanning from 100  $\mu\text{M}$  to 1000  $\mu\text{M}$ ,  
563 which might appear high; however, the available data suggest that these concentrations are  
564 relevant. Topical application of 300 mg of R-carvone or S-carvone, which are used as skin  
565 permeabilizers in transdermal patches, resulted in maximal plasma concentrations of  $\sim 0.6 \mu\text{M}$   
566 and  $\sim 0.2 \mu\text{M}$ , respectively [22]. On the other hand, local concentrations of carvones in  
567 keratinocytes, following the topical application, must be in orders of magnitude higher than  
568 plasma levels. Blood levels of carvone in volunteers, who received 100 mg of caraway oil  
569 ( $\sim 54.5$  mg carvone) in coated capsules, reached approx.  $0.1 \mu\text{M}$  [47]. However, local  
570 concentrations of carvones in enterocytes (intestinal first pass) and hepatocytes (hepatic first-  
571 pass) must be much higher than those reached in plasma. The concentration of carvones in  
572 meals is approx.  $150 \mu\text{M}$ , implying exposure of enterocytes to those concentrations when

573 consuming food containing EOs of caraway, spearmint, or dill [48]. Also, European Food  
574 Safety Authority EFSA defined acceptable daily intake of S-carvone as 0.6 mg/kg of body  
575 weight. Besides, a recent estimate based on recommended dose and published a fecal excreted  
576 fraction of 200 marketed drugs report a median expected colon concentration of 80  $\mu$ M for  
577 drugs having median serum concentration of 0.6  $\mu$ M, implying globally >100-times higher  
578 drug concentrations in the gut as compared to blood [49]. Collectively, potential clinical or  
579 preventive use of carvones as the AhR antagonists is predestined by their local effects (not  
580 systemic ones) on the skin (topical application) or in the intestines (peroral intake). Secondly,  
581 carvones' antagonism at the level of gene expression (mRNA, protein, EROD, luciferase)  
582 occurred with IC<sub>50</sub> values approx. From 10<sup>-5</sup> M to 10<sup>-4</sup> M, whereas 10<sup>-3</sup> M carvones  
583 antagonized the AhR functions (heterodimerization, DNA binding). The plausible explanation  
584 for this discrepancy could be differential cellular uptake of carvones, when the gene  
585 expression and the AhR functions were studied after 24 h and 90 min of incubation,  
586 respectively.

587 In summary, we report here dietary monocyclic monoterpenoid carvones, as a new class of  
588 non-competitive antagonists of the AhR, acting through allosteric binding at the AhR, thereby  
589 blocking heterodimerization with ARNT and constraining transcriptional functions of AhR-  
590 ARNT. While hundreds of orthosteric AhR ligands, including antagonists, were described,  
591 this is the first report on allosteric antagonism of the AhR by small-molecule compounds,  
592 which might be of clinical but also fundamental mechanistic importance.

593

#### 594 **ACKNOWLEDGEMENTS**

595 Financial support from Czech Health Research Council [NV19-05-00220], the student grant  
596 from Palacky University in Olomouc [PrF-2020-006], Juergen Manchot Foundation (to  
597 K.M.R.), NIH- R01CA222469, Department of Defense Partnering PI (W81XWH-17-1-0479;  
598 PR160167), (ES030197) (to S.M.) is acknowledged. We thank Dr. Radka Končítíková for the  
599 assistance with microscale thermophoresis experiments.

600

#### 601 **AUTHORS CONTRIBUTIONS**

602 *Participated in research design:* Z.D., T.H.S., S.M.

603 *Conducted experiments:* K.P., B.V., I.Z., K.K., E.J., R.V., K.M.R., S.K., D.K., M.K., M.Š.

604 *Contributed new reagents and analytic tools:* Z.D., T.H.S., S.K.

605 *Performed data analysis:* K.P., B.V., I.Z., K.K., E.J., R.V., J.V., K.M.R., S.K., Z.D., D.K.,  
606 M.K., M.Š.

607 *Wrote or contributed to the writing of the manuscript:* Z.D., T.H.S., S.M., S.K.

608

## 609 **COMPETING INTERESTS**

610 All authors declare that they have no competing interests.

611

## 612 **DATA AVAILABILITY**

613 All data needed to evaluate the paper's conclusion are present in the paper or the  
614 Supplementary Materials. Additional datasets generated during or analyzed during the  
615 current study are available from the corresponding author on reasonable request.

616

617

## 618 **MATERIALS & CORRESPONDENCE**

619 Zdeněk Dvořák

620 Department of Cell Biology and Genetics

621 Faculty of Science, Palacky University Olomouc

622 Slechtitelu 27; 783 71 Olomouc; Czech Republic

623 E: [moulin@email.cz](mailto:moulin@email.cz) T: +420-58-5634903 F: +420-58-5634901

624

625 Sridhar Mani

626 Department of Genetics and Department of Medicine

627 Albert Einstein College of Medicine

628 Bronx, NY 10461, U.S.A.

629 E: [sridhar.mani@einstein.yu.edu](mailto:sridhar.mani@einstein.yu.edu)

630

631

632

633

634

635

636

637

638

639

640

641

642

### 643 **FIGURE LEGENDS**

644 **Figure 1. Non-competitive antagonism of the AhR by carvones.** Reporter gene assay was  
645 carried out in stably transfected AZ-AHR cells, incubated for 24 h with tested compounds.  
646 Experiments were performed in two independent cell passages. Incubations and  
647 measurements were performed in quadruplicates (technical replicates). **(A)** Basal activity of  
648 AhR: left – the structure of carvones; middle - effects of AhR agonists TCDD, BaP, and FICZ  
649 ( $EC_{50}$  and  $EC_{80}$  values indicated in the graph); right – effects of carvones. **(B)** Agonist-  
650 inducible AhR activity: combined incubations with fixed concentrations of agonists (at  $EC_{80}$ )  
651 and increasing concentrations of carvones ( $IC_{50}$  and  $K_i$  values indicated in the graph). **(C)**  
652 Non-competitive antagonism of carvones: combined incubations with a fixed concentration of  
653 carvones and increasing concentrations of AhR agonists.

654

655 **Figure 2. Down-regulation of CYP1A1 in human cell lines by carvones.** HepG2, LS180,  
656 and HaCaT cells were incubated for 24 h with carvones (0  $\mu$ M – 1000  $\mu$ M) in the presence of  
657 AhR agonists TCDD, BaP and FICZ, applied in their  $EC_{80}$  concentrations. Incubations and  
658 measurements were performed in triplicates (technical replicates). **(A)** RT-PCR analyses of  
659 CYP1A1 mRNA; results expressed relative to agonist in the absence of carvones (100%).  
660 Data are mean  $\pm$  S.D. from two independent cell passages. Results were normalized using  
661 GAPDH as a housekeeping gene. The absolute values of CYP1A1 mRNA fold inductions  
662 (F.I.) by model agonists are indicated in-text inserted in bar graphs from each cell line. **(B)**  
663 Quantitative automated western-blot analysis by SallySue of CYP1A1 protein. Representative  
664 SallySue records from one cell passage are shown. Bar graphs at the bottom show quantified  
665 CYP1A1 protein normalized *per*  $\beta$ -actin; data are expressed relative to agonist in the absence  
666 of carvones (100%) and are mean  $\pm$  S.D. from two independent cell passages. \* =  
667 significantly different from ligand in the absence of carvones ( $p < 0.05$ )

668

### 669 **Figure 3. Carvones influence cellular functions of the AhR.**

670 Cells were incubated for 90 min with carvones (1000  $\mu$ M) in combination with vehicle (0.1%  
671 DMSO) or AhR agonists TCDD (20 nM), BaP (7  $\mu$ M), and FICZ (8 nM).



672 **(A) Nuclear translocation of the AhR is not influenced by carvones.** Microscopic  
673 specimens from LS180 cells were prepared using Alexa Fluor 488 labeled primary antibody  
674 against AhR and DAPI. The AhR was visualized and evaluated using a fluorescence  
675 microscope. Experiments were performed in two consecutive cell passages, with all tested  
676 compounds in duplicates. The representative images are shown. **(B) Carvones inhibit the**  
677 **formation of AhR-ARNT heterodimer.** Protein co-immunoprecipitation – formation of  
678 AhR-ARNT heterodimer in LS180 cells. Representative immunoblots of immuno-precipitated  
679 protein eluates and total cell lysates are shown. Experiments were performed in three  
680 consecutive cell passages. **(C) Carvones inhibit the binding of the AhR in the CYP1A1**  
681 **promoter.** Chromatin immunoprecipitation ChIP – binding of the AhR in CYP1A1 promoter  
682 in HepG2 cells. Bar graph (top) shows enrichment of CYP1A1 promotor with the AhR as  
683 compared to vehicle-treated cells. Representative DNA fragments amplified by PCR analyzed  
684 on a 2% agarose gel are from the 2<sup>nd</sup> experiment (bottom). Experiments were performed in  
685 three consecutive cell passages. **(D) Schematic depiction of carvones' cellular effects on**  
686 **the AhR.**

687  
688 **Figure 4. Evaluation of off-target effects of carvones. (A) PKC inhibition assay:** Catalytic  
689 activity of PKC was measured in lysates from HepG2 cells incubated with vehicle (DMSO,  
690 0.1% V/V), staurosporine (1 $\mu$ M), and carvones (10  $\mu$ M; 100  $\mu$ M; 1000  $\mu$ M). Data are mean  $\pm$   
691 S.D. from three independent experiments. Incubations and measurements were performed in  
692 uniplicates (technical replicates). **(B) KINOMEscan<sup>TM</sup> profiling:** The interaction between  
693 100  $\mu$ M S-carvone and 468 human protein kinases, employing KINOMEscan<sup>TM</sup> (scanMAX  
694 assay), proprietary active site-directed competition binding assay. A low-resolution  
695 interaction map is shown. **(C) Hypoxia-mimic VEGF induction:** HaCaT cells were  
696 incubated for 24 h with carvones (10  $\mu$ M; 100  $\mu$ M; 1000  $\mu$ M) in combination with vehicle  
697 (0.1% DMSO) or deferoxamine (DFX; 200  $\mu$ M). The expression of VEGF and CYP1A1  
698 mRNAs was measured using RT-PCR. Incubations and measurements were performed in  
699 duplicates (technical replicates). Data are mean  $\pm$  S.D. from three independent cell passages  
700 and are expressed as fold induction over the vehicle-treated cells. Results were normalized  
701 using GAPDH as a housekeeping gene.

702  
703 **Figure 5. Binding of S-carvone at the AhR. (A) Competitive radioligand binding assay:**  
704 Cytosolic protein (2 mg/mL) from Hepa1c1c7 cells was incubated with S-carvone (1  $\mu$ M, 10

705  $\mu\text{M}$ , 100  $\mu\text{M}$ , 1000  $\mu\text{M}$ ), FICZ (10 nM), DEX (100 nM; negative control) or DMSO (0.1%  
706 V/V; corresponds to *specific binding of [<sup>3</sup>H]-TCDD = 100%*) in the presence of 2 nM [<sup>3</sup>H]-  
707 TCDD. Specific binding of [<sup>3</sup>H]-TCDD was determined as a difference between total and  
708 non-specific (200 nM; 2,3,7,8-tetrachlorodibenzofuran) reactions. The significance ( $p < 0.05$ )  
709 was tested against negative control (\*). Five independent experiments were performed, and  
710 the incubations and measurements were done in triplicates in each experiment (technical  
711 replicates). The error bars represent the mean  $\pm$  S.D. **(B) Molecular docking:** S-carvone  
712 (licorice stick and colored atom type, Carbon = cyan and Oxygen = red) binds to a site  
713 proximal to the heterodimerization interface of AhR (depicted as orange ribbons with  
714 interface residues shown as blue licorice sticks and labeled; left panel) with residues from  $\alpha 1$   
715 and  $\alpha 2$  helices contributing to the binding interactions (center panel). Binding of S-Carvone to  
716 this site also leads to conformational changes in  $\alpha 1$  and  $\alpha 2$  helices (new positions shown as  
717 cyan ribbons; right panel), thereby disrupting the formation of AhR-ARNT interface. **(C)**  
718 **Microscale thermophoresis;** *left panel:* co-expressed hAhR-His + mARNT-Flag incubated  
719 with vehicle and/or S-carvone (0.25 mM, 0.5 mM, 1 mM); *central panel:* co-expressed His-  
720 hAhR + FLAG-mARNT incubated with vehicle and/or S-carvone (1 mM, 2 mM, 4 mM);  
721 *right panel:* FLAG-mARNT incubated with the vehicle or 1 mM S-carvone.

722

723 **Supplementary Figure 1. Down-regulation of CYP1A1 and CYP1A2 mRNAs in primary**  
724 **cultures of human hepatocytes.** Human hepatocytes cultures from three tissue donors  
725 (LH75, HEP200571, HEP220993) were incubated for 24 h with carvones (10  $\mu\text{M}$ , 100  $\mu\text{M}$ ,  
726 1000  $\mu\text{M}$ ) in the presence of AhR agonists TCDD (5 nM, 50 nM), BaP (1  $\mu\text{M}$ , 10  $\mu\text{M}$ ) and  
727 FICZ (10 nM, 100 nM). RT-PCR quantified CYP1As mRNAs. **(A)** Fold induction of CYP1A  
728 genes by AhR agonists; **(B)** Percentage of CYP1As maximal induction by model agonists in  
729 the presence of carvones. Data were normalized using GAPDH as a housekeeping gene.

730

731 **Supplementary Figure 2. Down-regulation of 7-ethoxyresorufin-O-deethylase EROD by**  
732 **S-carvone in hepatoma cells.** Catalytic activity of EROD was measured using fluorescent  
733 substrate in AZ-AHR cells pre-incubated for 24 h with vehicle (DMSO; 0.1% v/v), TCDD  
734 (13.5 nM) and/or mixture of S-carvone (1 mM) + TCDD (13.5 nM). Incubations and  
735 measurements were performed in triplicates (technical replicates). The bar graph data are  
736 mean  $\pm$  S.D. from three consecutive cell passages and are expressed as the percentage of  
737 fluorescence in TCDD-treated cells.

738

739 **Supplementary Figure 3. KINOMEscan™ profiling:** The interaction between 100 μM S-  
740 carvone and 468 human protein kinases, employing KINOMEscan™ (scanMAX assay),  
741 proprietary active site-directed competition binding assay. A high-resolution interaction map  
742 is shown.

743

744 **Supplementary Figure 4. D-limonene does not interact with the AhR. (A) Chemical**  
745 **structures** of S-carvone and D-limonene and their schematic interaction with the AhR; **(B)**  
746 **Reporter gene assay** was carried out in AZ-AHR cells, incubated for 24 h with increasing  
747 concentrations of D-limonene in combination with the AhR agonists TCDD (13.5 nM), BaP  
748 (15.8 μM) and FICZ (22.6 μM). Incubations and measurements were performed in  
749 quadruplicates (technical replicates). The bar graph shows the percentage of maximal  
750 induction attained by a model AhR agonist. Data are mean ± S.D. from three consecutive cell  
751 passages. \* = significantly different from AhR agonist in the absence of D-limonene (p<0.05);  
752 **(C) Microscale thermophoresis** using co-expressed His-hAhR + FLAG-mARNT incubated  
753 with vehicle (upper panel) or 1 mM D-limonene (lower panel).

754

755 **Supplementary Table 1. Quantitative analysis of S/R-carvones in reporter gene assay**  
756 **against uncompetitive antagonism.** Reporter gene assay was carried out in stably transfected  
757 AZ-AHR cells, incubated for 24 h with a fixed concentration of S/R-carvones combined with  
758 increasing concentrations of AhR agonists. Experiments were performed in two independent  
759 cell passages. Incubations and measurements were performed in quadruplicates (technical  
760 replicates). Percentage of inhibition by S/R-carvones (10 μM; 100 μM; 500 μM; 1000 μM)  
761 was calculated for all tested agonists as follows:

$$762 \quad \% \text{ Inhibition } C_x = 100 * (\text{CARVONE } C_0 - \text{CARVONE } C_x) / \text{CARVONE } C_0$$

763

764 **Supplementary Table 2. Carvones do not influence the nuclear translocation of AhR.**  
765 LS180 cells were incubated for 90 min with S/R-carvones (1000 μM) in combination with  
766 vehicle (0.1% DMSO) or AhR agonists TCDD (20 nM), BaP (7 μM), and FICZ (8 nM).  
767 Microscopic specimens were prepared using Alexa Fluor 488 labeled primary antibody  
768 against AhR and DAPI. AhR was visualized and evaluated using a fluorescence microscope.  
769 Experiments were performed in two consecutive cell passages, with all tested compounds in  
770 duplicates. The table shows the total and AhR-positive counts of cells.

771  
772  
773  
774  
775  
776  
777  
778  
779  
780  
781  
782  
783  
784  
785  
786  
787  
788  
789  
790  
791  
792  
793  
794  
795  
796  
797  
798  
799  
800  
801  
802  
803  
804  
805  
806  
807  
808  
809  
810  
811  
812  
813  
814  
815  
816  
817  
818

## REFERENCES

1. Stejskalova L, Dvorak Z, Pavek P (2011) Endogenous and exogenous ligands of aryl hydrocarbon receptor: current state of art. *Curr Drug Metab* 12: 198-212.
2. Angelos MG, Kaufman DS (2018) Advances in the role of the aryl hydrocarbon receptor to regulate early hematopoietic development. *Curr Opin Hematol* 25: 273-278.
3. Bock KW (2018) From TCDD-mediated toxicity to searches of physiologic AHR functions. *Biochem Pharmacol* 155: 419-424.
4. Gutierrez-Vazquez C, Quintana FJ (2018) Regulation of the Immune Response by the Aryl Hydrocarbon Receptor. *Immunity* 48: 19-33.
5. Fang ZZ, Krausz KW, Nagaoka K, Tanaka N, Gowda K, et al. (2014) In vivo effects of the pure aryl hydrocarbon receptor antagonist GNF-351 after oral administration are limited to the gastrointestinal tract. *Br J Pharmacol* 171: 1735-1746.
6. Ghotbaddini M, Moultrie V, Powell JB (2018) Constitutive Aryl Hydrocarbon Receptor Signaling in Prostate Cancer Progression. *J Cancer Treatment Diagn* 2: 11-16.
7. Chen J, Haller CA, Jernigan FE, Koerner SK, Wong DJ, et al. (2020) Modulation of lymphocyte-mediated tissue repair by rational design of heterocyclic aryl hydrocarbon receptor agonists. *Sci Adv* 6: eaay8230.
8. Safe S, Cheng Y, Jin UH (2017) The Aryl Hydrocarbon Receptor (AhR) as a Drug Target for Cancer Chemotherapy. *Curr Opin Toxicol* 2: 24-29.
9. Wilhelm SM, Rjater RG, Kale-Pradhan PB (2013) Perils and pitfalls of long-term effects of proton pump inhibitors. *Expert Rev Clin Pharmacol* 6: 443-451.
10. Dvorak Z, Vrzal R, Henklova P, Jancova P, Anzenbacherova E, et al. (2008) JNK inhibitor SP600125 is a partial agonist of human aryl hydrocarbon receptor and induces CYP1A1 and CYP1A2 genes in primary human hepatocytes. *Biochem Pharmacol* 75: 580-588.
11. Lu YF, Santostefano M, Cunningham BD, Threadgill MD, Safe S (1995) Identification of 3'-methoxy-4'-nitroflavone as a pure aryl hydrocarbon (Ah) receptor antagonist and evidence for more than one form of the nuclear Ah receptor in MCF-7 human breast cancer cells. *Arch Biochem Biophys* 316: 470-477.
12. Zhou J, Gasiewicz TA (2003) 3'-methoxy-4'-nitroflavone, a reported aryl hydrocarbon receptor antagonist, enhances Cyp1a1 transcription by a dioxin responsive element-dependent mechanism. *Arch Biochem Biophys* 416: 68-80.
13. Kim SH, Henry EC, Kim DK, Kim YH, Shin KJ, et al. (2006) Novel compound 2-methyl-2H-pyrazole-3-carboxylic acid (2-methyl-4-o-tolylazo-phenyl)-amide (CH-223191) prevents 2,3,7,8-TCDD-induced toxicity by antagonizing the aryl hydrocarbon receptor. *Mol Pharmacol* 69: 1871-1878.
14. Choi EY, Lee H, Dingle RW, Kim KB, Swanson HI (2012) Development of novel CH223191-based antagonists of the aryl hydrocarbon receptor. *Mol Pharmacol* 81: 3-11.
15. Zhao B, Degroot DE, Hayashi A, He G, Denison MS (2010) CH223191 is a ligand-selective antagonist of the Ah (Dioxin) receptor. *Toxicol Sci* 117: 393-403.
16. Smith KJ, Murray IA, Tanos R, Tellew J, Boitano AE, et al. (2011) Identification of a high-affinity ligand that exhibits complete aryl hydrocarbon receptor antagonism. *J Pharmacol Exp Ther* 338: 318-327.
17. Bianchi-Smiraglia A, Bagati A, Fink EE, Affronti HC, Lipchick BC, et al. (2018) Inhibition of the aryl hydrocarbon receptor/polyamine biosynthesis axis suppresses multiple myeloma. *J Clin Invest* 128: 4682-4696.

- 819 18. Corre S, Tardif N, Mouchet N, Leclair HM, Boussemart L, et al. (2018) Sustained activation of the  
820 Aryl hydrocarbon Receptor transcription factor promotes resistance to BRAF-inhibitors in  
821 melanoma. *Nat Commun* 9: 4775.
- 822 19. Hawerkamp HC, Kislak A, Gerber PA, Pollet M, Rolfes KM, et al. (2019) Vemurafenib acts as an aryl  
823 hydrocarbon receptor antagonist: Implications for inflammatory cutaneous adverse events.  
824 *Allergy* 74: 2437-2448.
- 825 20. Bartonkova I, Dvorak Z (2018) Essential oils of culinary herbs and spices display agonist and  
826 antagonist activities at human aryl hydrocarbon receptor AhR. *Food Chem Toxicol* 111: 374-  
827 384.
- 828 21. Geithe C, Protze J, Kreuchwig F, Krause G, Krautwurst D (2017) Structural determinants of a  
829 conserved enantiomer-selective carvone binding pocket in the human odorant receptor  
830 OR1A1. *Cell Mol Life Sci* 74: 4209-4229.
- 831 22. Jager W, Mayer M, Reznicek G, Buchbauer G (2001) Percutaneous absorption of the  
832 monoterpene carvone: implication of stereoselective metabolism on blood levels. *J Pharm  
833 Pharmacol* 53: 637-642.
- 834 23. Novotna A, Pavek P, Dvorak Z (2011) Novel stably transfected gene reporter human hepatoma  
835 cell line for assessment of aryl hydrocarbon receptor transcriptional activity: construction  
836 and characterization. *Environ Sci Technol* 45: 10133-10139.
- 837 24. Denison MS, Rogers JM, Rushing SR, Jones CL, Tetangco SC, et al. (2002) Analysis of the aryl  
838 hydrocarbon receptor (AhR) signal transduction pathway. *Curr Protoc Toxicol* Chapter 4:  
839 Unit4 8.
- 840 25. Stepankova M, Bartonkova I, Jiskrova E, Vrzal R, Mani S, et al. (2018) Methylindoles and  
841 Methoxyindoles are Agonists and Antagonists of Human Aryl Hydrocarbon Receptor. *Mol  
842 Pharmacol* 93: 631-644.
- 843 26. Fabian MA, Biggs WH, 3rd, Treiber DK, Atteridge CE, Azimioara MD, et al. (2005) A small  
844 molecule-kinase interaction map for clinical kinase inhibitors. *Nat Biotechnol* 23: 329-336.
- 845 27. Schulte KW, Green E, Wilz A, Platten M, Daumke O (2017) Structural Basis for Aryl Hydrocarbon  
846 Receptor-Mediated Gene Activation. *Structure* 25: 1025-1033 e1023.
- 847 28. Wu D, Su X, Potluri N, Kim Y, Rastinejad F (2016) NPAS1-ARNT and NPAS3-ARNT crystal structures  
848 implicate the bHLH-PAS family as multi-ligand binding transcription factors. *Elife* 5.
- 849 29. Jones G, Willett P, Glen RC (1995) Molecular recognition of receptor sites using a genetic  
850 algorithm with a description of desolvation. *J Mol Biol* 245: 43-53.
- 851 30. Puyskens A, Stinn A, van der Vaart M, Kreuchwig A, Protze J, et al. (2020) Aryl Hydrocarbon  
852 Receptor Modulation by Tuberculosis Drugs Impairs Host Defense and Treatment Outcomes.  
853 *Cell Host Microbe* 27: 238-248 e237.
- 854 31. Shevchenko A, Tomas H, Havlis J, Olsen JV, Mann M (2006) In-gel digestion for mass  
855 spectrometric characterization of proteins and proteomes. *Nat Protoc* 1: 2856-2860.
- 856 32. Perutka Z, Sufeisl M, Strnad M, Sebela M (2019) High-proline proteins in experimental hazy white  
857 wine produced from partially botrytized grapes. *Biotechnol Appl Biochem* 66: 398-411.
- 858 33. Cheng Y, Prusoff WH (1973) Relationship between the inhibition constant (K<sub>1</sub>) and the  
859 concentration of inhibitor which causes 50 per cent inhibition (I<sub>50</sub>) of an enzymatic reaction.  
860 *Biochem Pharmacol* 22: 3099-3108.
- 861 34. Chen HSV, Pellegrini JW, Aggarwal SK, Lei SZ, Warach S, et al. (1992) Open-Channel Block of N-  
862 Methyl-D-Aspartate (Nmda) Responses by Memantine - Therapeutic Advantage against  
863 Nmda Receptor-Mediated Neurotoxicity. *Journal of Neuroscience* 12: 4427-4436.
- 864 35. Long WP, Pray-Grant M, Tsai JC, Perdeu GH (1998) Protein kinase C activity is required for aryl  
865 hydrocarbon receptor pathway-mediated signal transduction. *Mol Pharmacol* 53: 691-700.
- 866 36. Seok SH, Lee W, Jiang L, Molugu K, Zheng A, et al. (2017) Structural hierarchy controlling  
867 dimerization and target DNA recognition in the AHR transcriptional complex. *Proc Natl Acad  
868 Sci U S A* 114: 5431-5436.
- 869 37. Backlund M, Ingelman-Sundberg M (2005) Regulation of aryl hydrocarbon receptor signal  
870 transduction by protein tyrosine kinases. *Cell Signal* 17: 39-48.

- 871 38. Oesch-Bartlomowicz B, Huelster A, Wiss O, Antoniou-Lipfert P, Dietrich C, et al. (2005) Aryl  
872 hydrocarbon receptor activation by cAMP vs. dioxin: divergent signaling pathways. *Proc Natl*  
873 *Acad Sci U S A* 102: 9218-9223.
- 874 39. Giani Tagliabue S, Faber SC, Motta S, Denison MS, Bonati L (2019) Modeling the binding of diverse  
875 ligands within the Ah receptor ligand binding domain. *Sci Rep* 9: 10693.
- 876 40. Abdel-Magid AF (2015) Allosteric modulators: an emerging concept in drug discovery. *ACS Med*  
877 *Chem Lett* 6: 104-107.
- 878 41. Venkatesh M, Wang H, Cayer J, Leroux M, Salvail D, et al. (2011) In vivo and in vitro  
879 characterization of a first-in-class novelazole analog that targets pregnane X receptor  
880 activation. *Mol Pharmacol* 80: 124-135.
- 881 42. Ekins S, Chang C, Mani S, Krasowski MD, Reschly EJ, et al. (2007) Human pregnane X receptor  
882 antagonists and agonists define molecular requirements for different binding sites. *Mol*  
883 *Pharmacol* 72: 592-603.
- 884 43. Scheuermann TH, Li Q, Ma HW, Key J, Zhang L, et al. (2013) Allosteric inhibition of hypoxia  
885 inducible factor-2 with small molecules. *Nat Chem Biol* 9: 271-276.
- 886 44. Corrada D, Soshilov AA, Denison MS, Bonati L (2016) Deciphering Dimerization Modes of PAS  
887 Domains: Computational and Experimental Analyses of the AhR:ARNT Complex Reveal New  
888 Insights Into the Mechanisms of AhR Transformation. *PLoS Comput Biol* 12: e1004981.
- 889 45. Corrada D, Denison MS, Bonati L (2017) Structural modeling of the AhR:ARNT complex in the  
890 bHLH-PASA-PASB region elucidates the key determinants of dimerization. *Mol Biosyst* 13:  
891 981-990.
- 892 46. Wu D, Potluri N, Kim Y, Rastinejad F (2013) Structure and dimerization properties of the aryl  
893 hydrocarbon receptor PAS-A domain. *Mol Cell Biol* 33: 4346-4356.
- 894 47. Mascher H, Kikuta C, Schiel H (2001) Pharmacokinetics of menthol and carvone after  
895 administration of an enteric coated formulation containing peppermint oil and caraway oil.  
896 *Arzneimittelforschung* 51: 465-469.
- 897 48. Bartonkova I, Dvorak Z (2018) Essential oils of culinary herbs and spices activate PXR and induce  
898 CYP3A4 in human intestinal and hepatic in vitro models. *Toxicol Lett* 296: 1-9.
- 899 49. Maier L, Pruteanu M, Kuhn M, Zeller G, Telzerow A, et al. (2018) Extensive impact of non-  
900 antibiotic drugs on human gut bacteria. *Nature* 555: 623-628.

901



**A**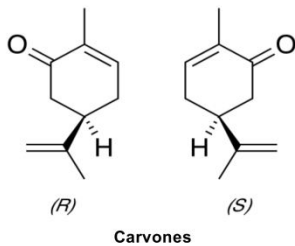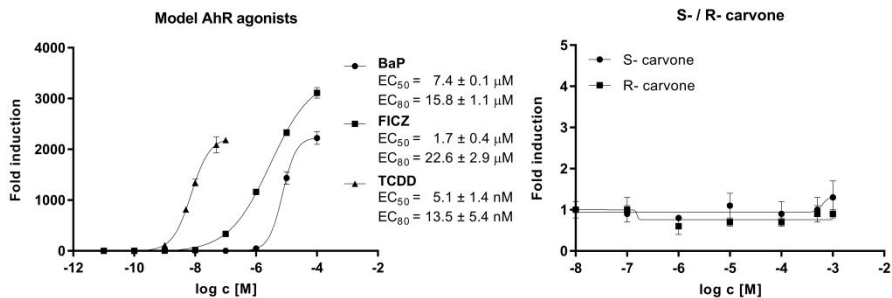**B**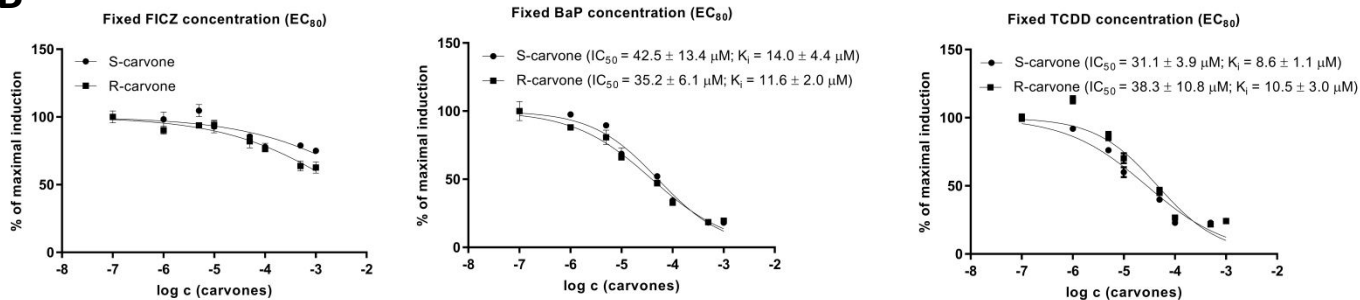**C****S-carvone****R-carvone****Fixed antagonist (S-carvone) with increasing concentration of BaP****Fixed antagonist (R-carvone) with increasing concentration of BaP**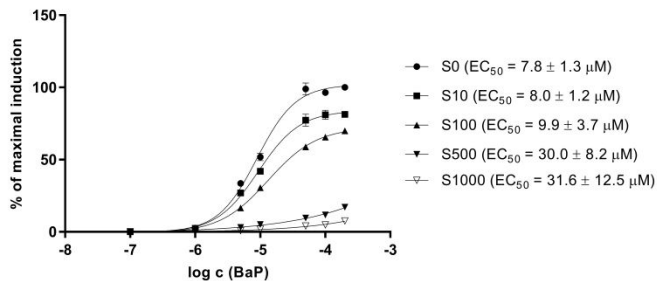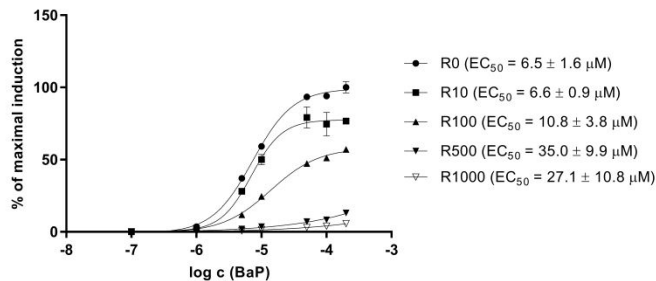**Fixed antagonist (S-carvone) with increasing concentration of TCDD****Fixed antagonist (R-carvone) with increasing concentration of TCDD**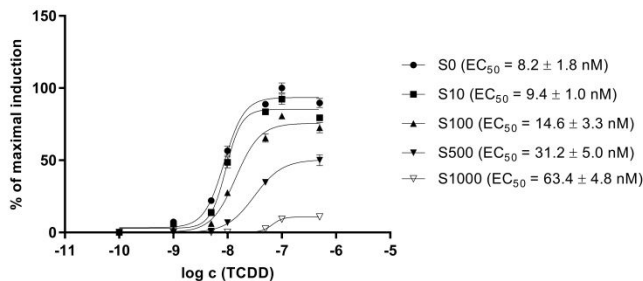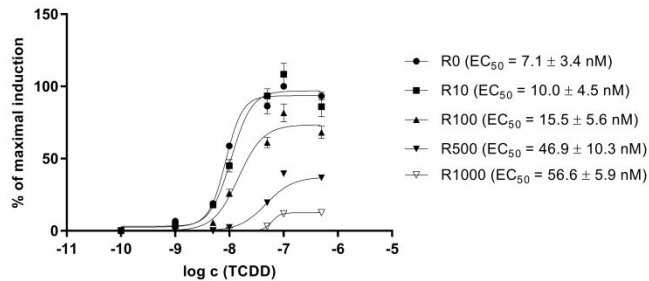**Fixed antagonist (S-carvone) with increasing concentration of FICZ****Fixed antagonist (R-carvone) with increasing concentration of FICZ**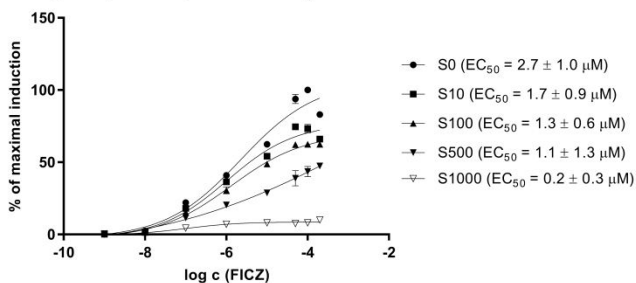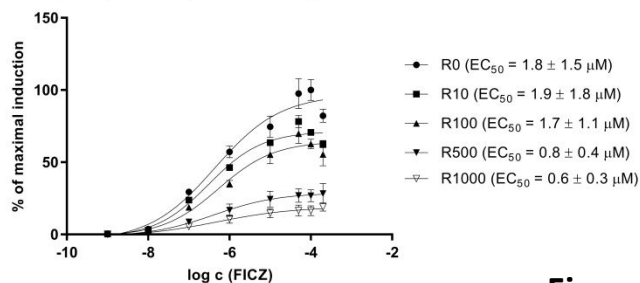**Figure 1**

**A**

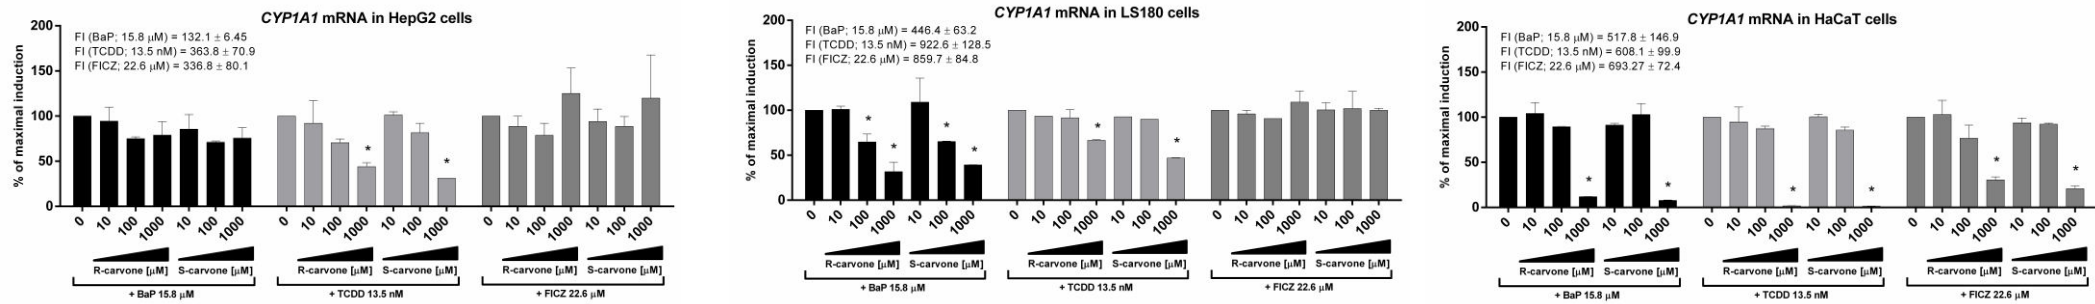

**B**

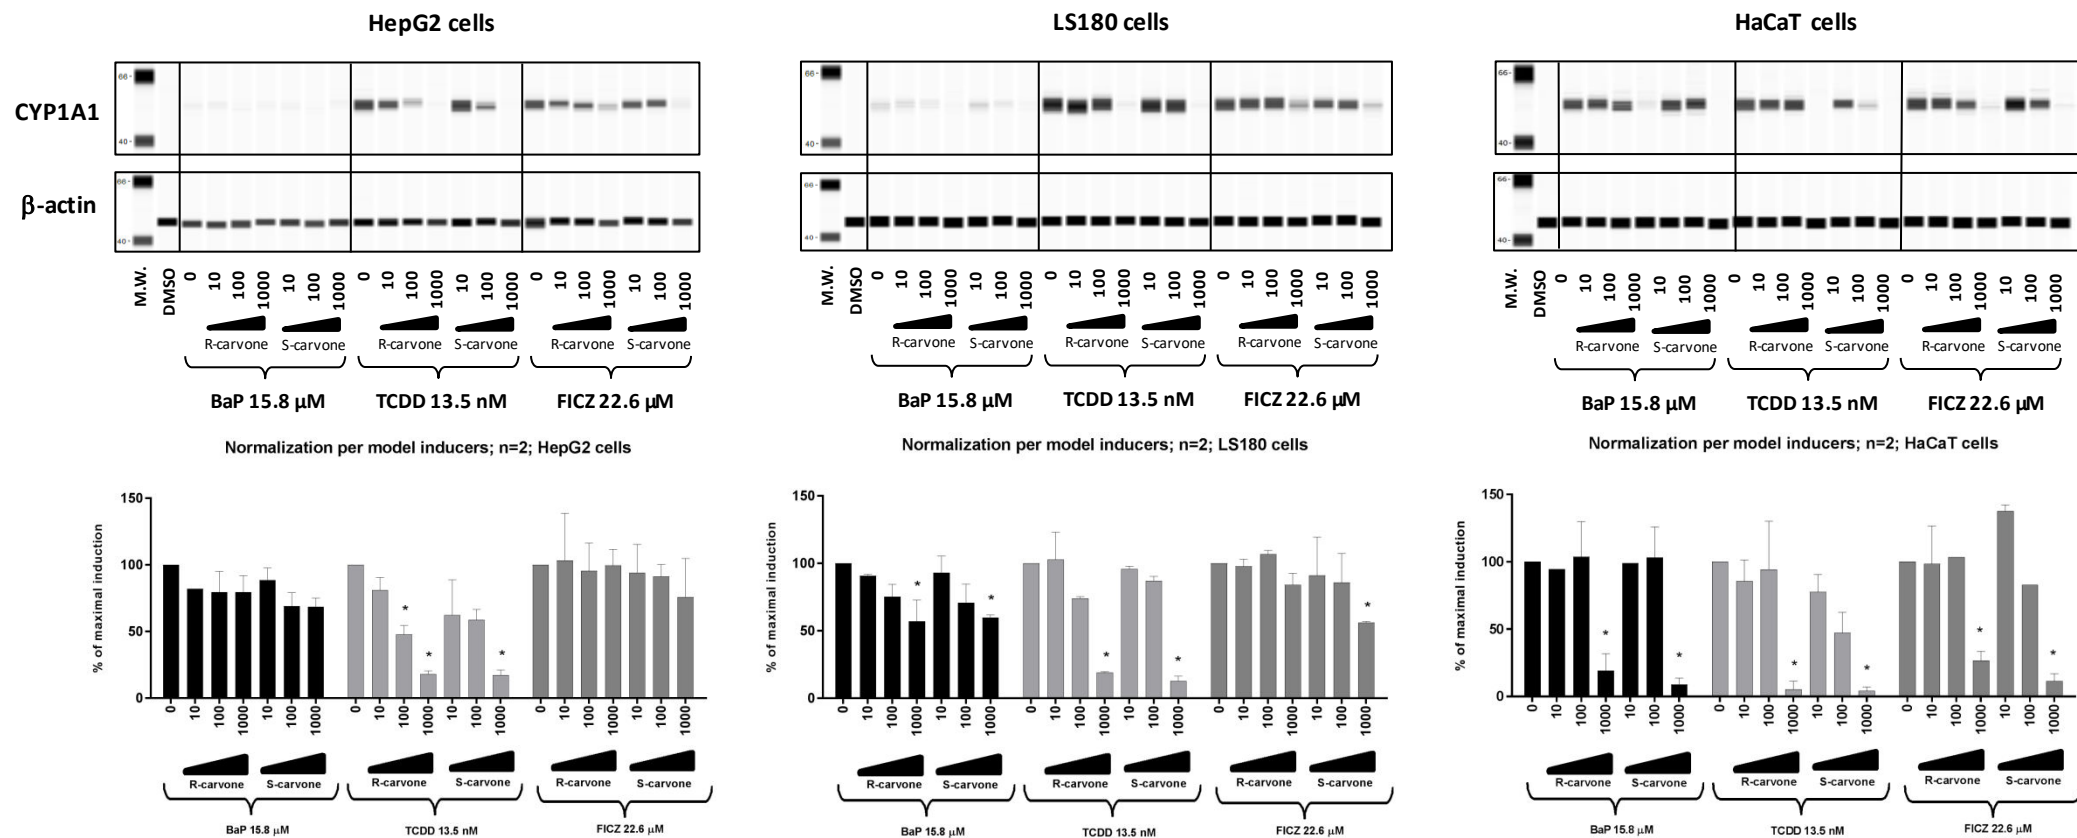

**Figure 2**

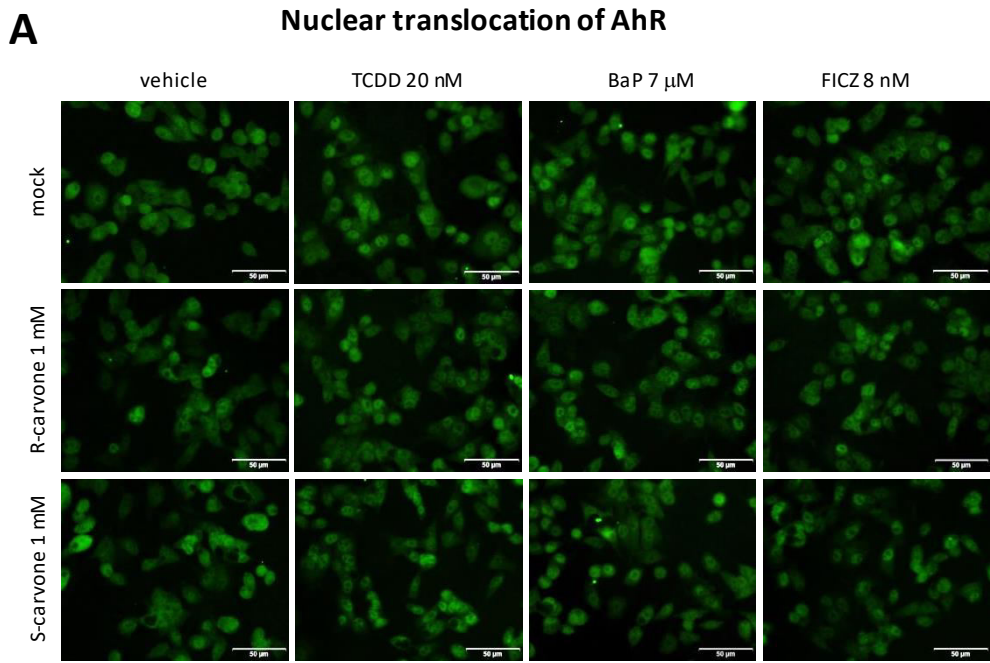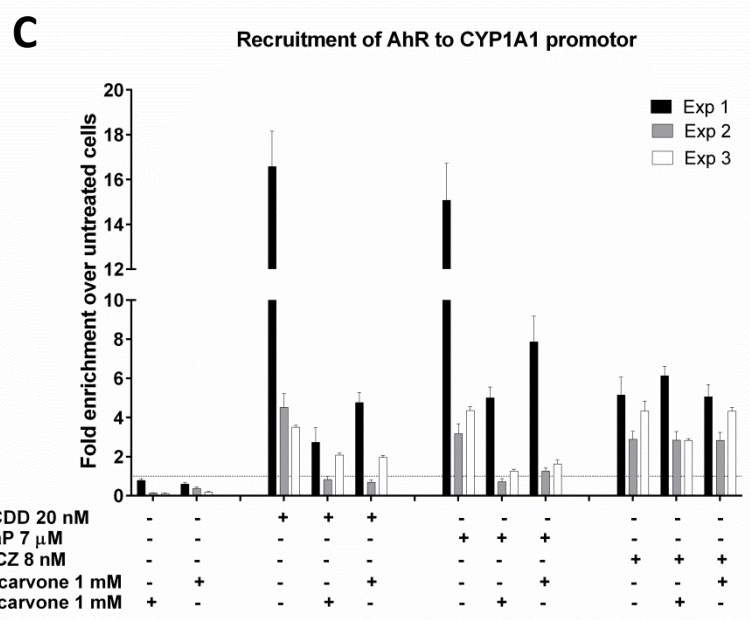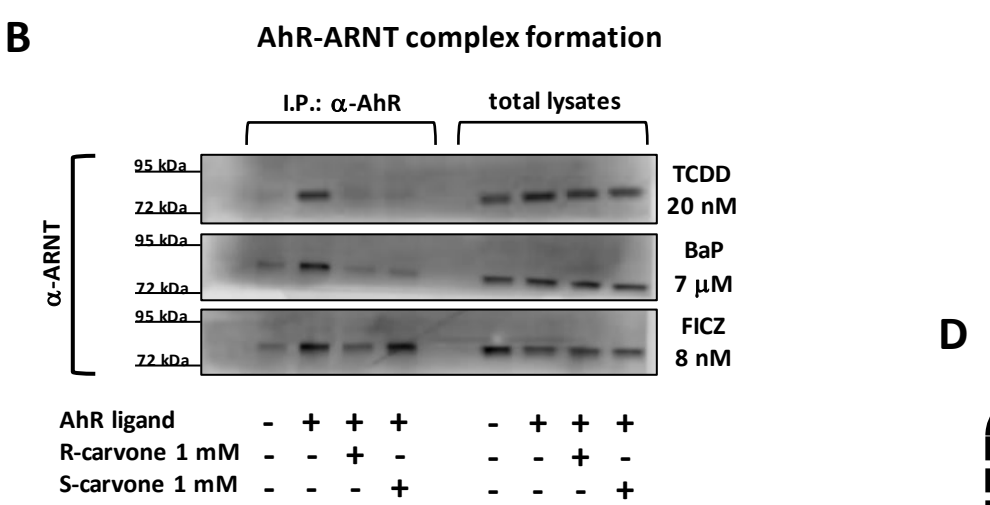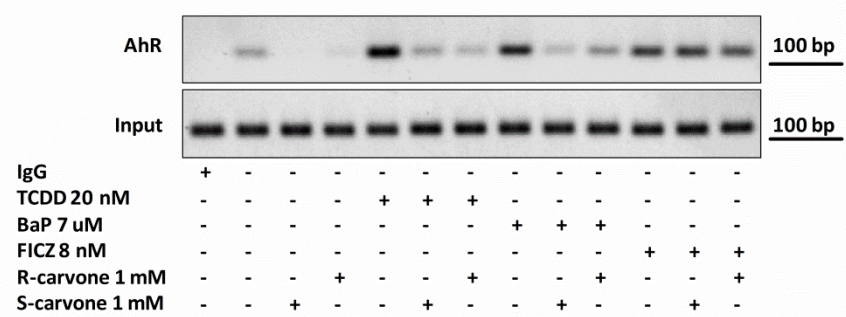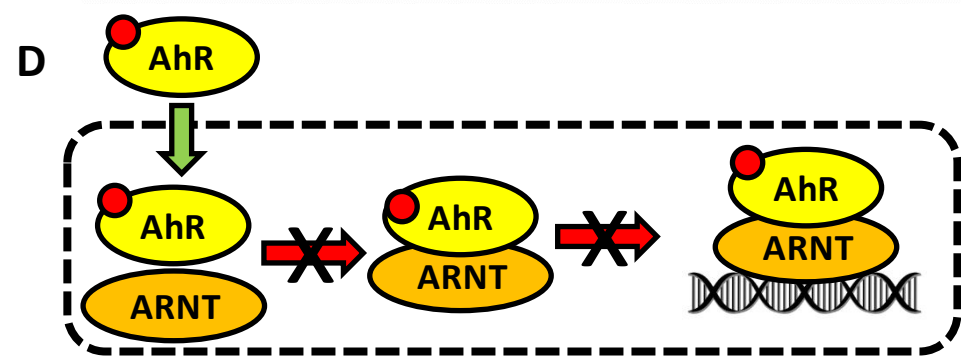

Figure 3

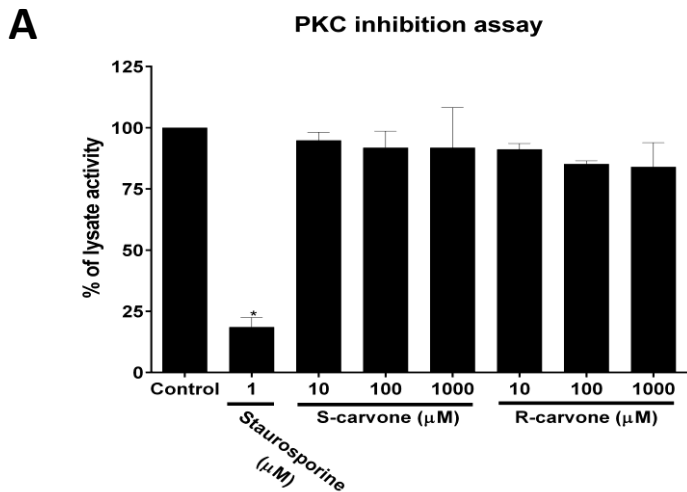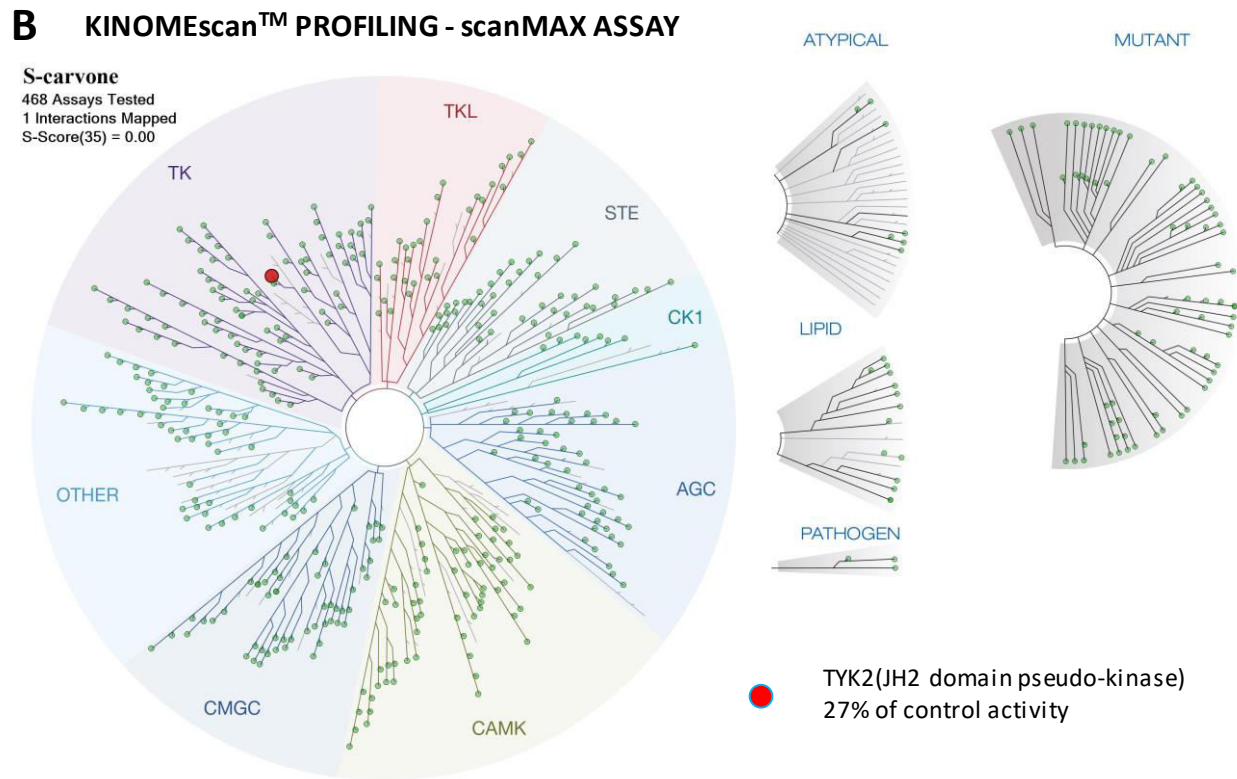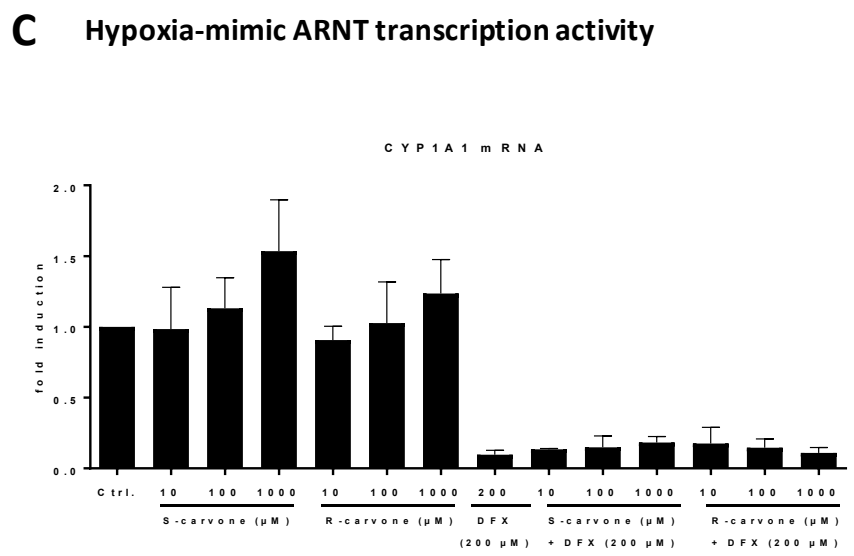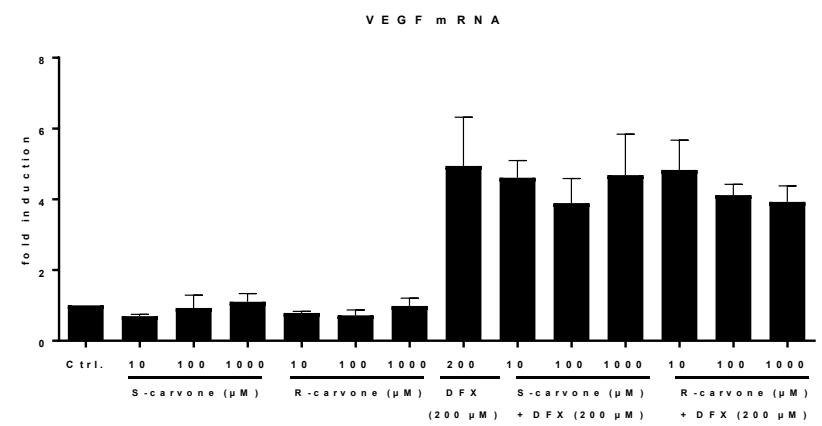

Figure 4

**A****AhR radioligand binding assay**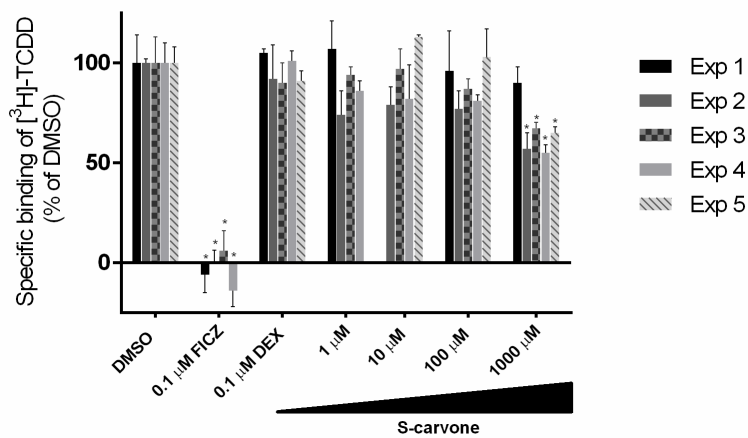**B**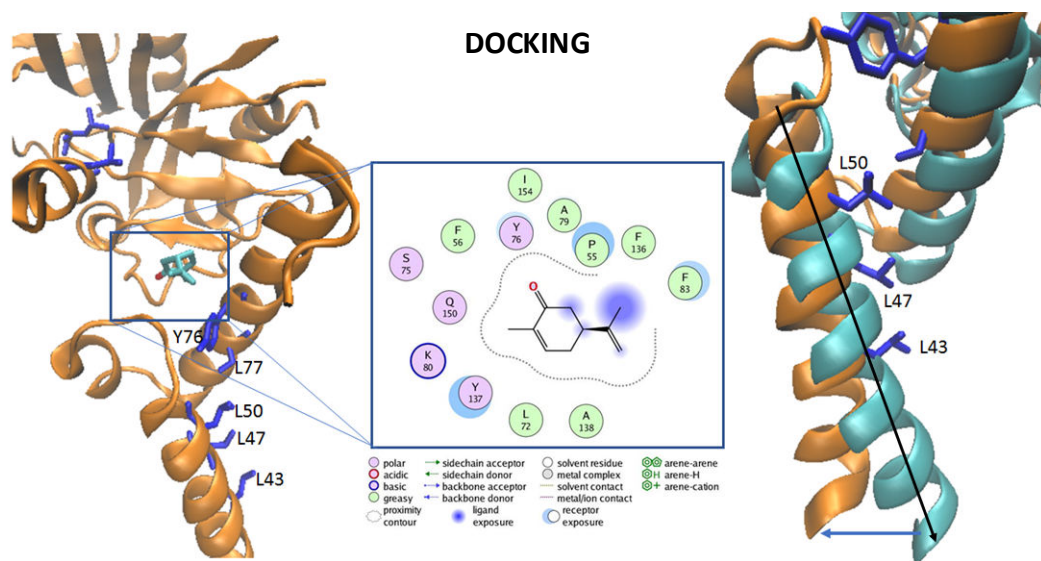**C****MICROSCALE THERMOPHORESIS**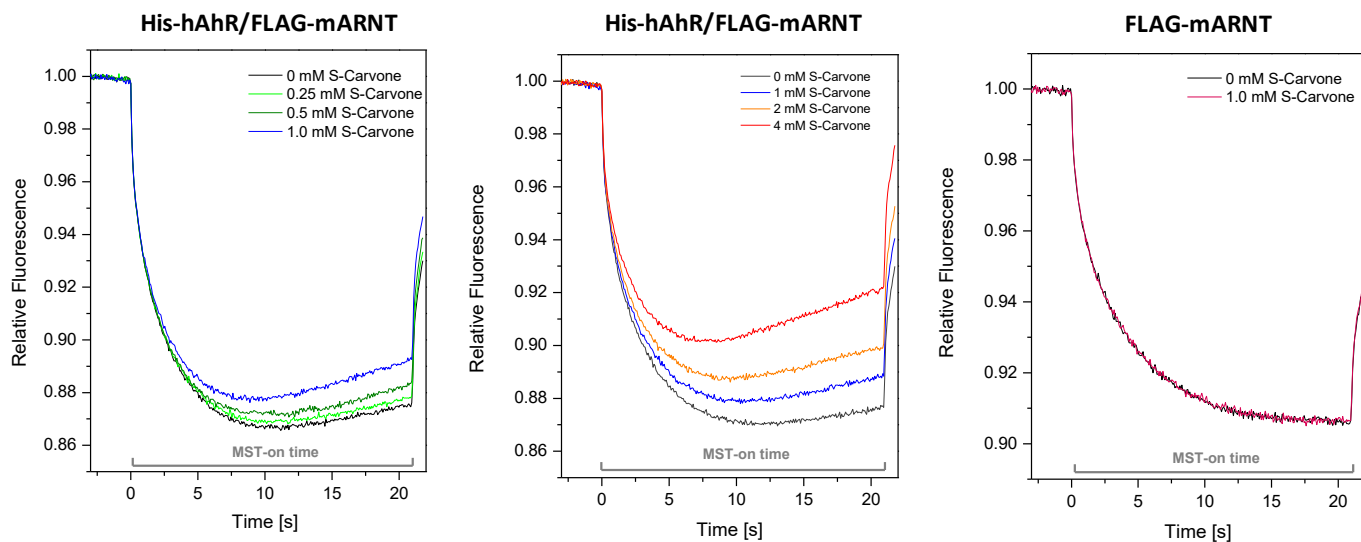**Figure 5**
